# Supplementary material for: Rivaroxaban attenuates neutrophil maturation in the bone marrow niche
Source: Springer Nature journal article supplement (doi:10.1007/s00395-023-01001-5), 2023-08-14
Supplement: MOESM1 [file 25920890]

# Supplementary Figure S1

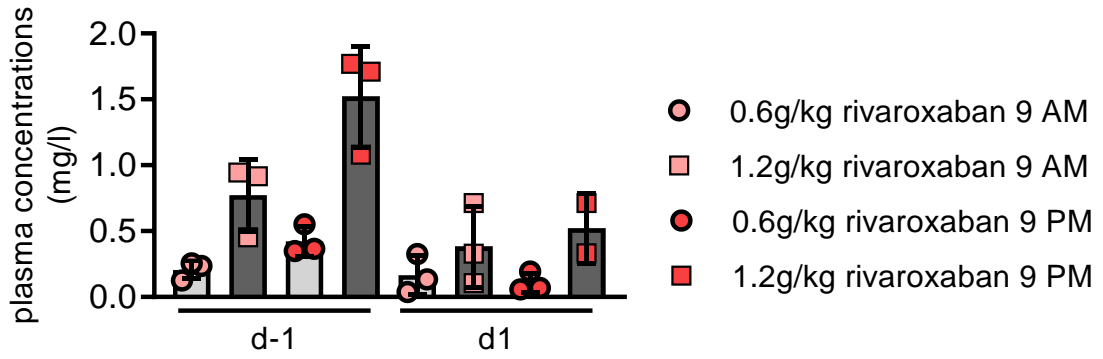

**Figure S1. Rivaroxaban plasma levels.** C57BL6/J mice were treated with 0.6 or 1.2g rivaroxaban/kg diet for seven days prior to I/R injury. Rivaroxaban plasma concentration 24 hours prior to (d-1) or post (d1) cardiac I/R; n = 2-3. Cardiac blood was harvested at 9 AM or 9 PM. Data represent mean  $\pm$  SEM.

# Supplementary Figure S2

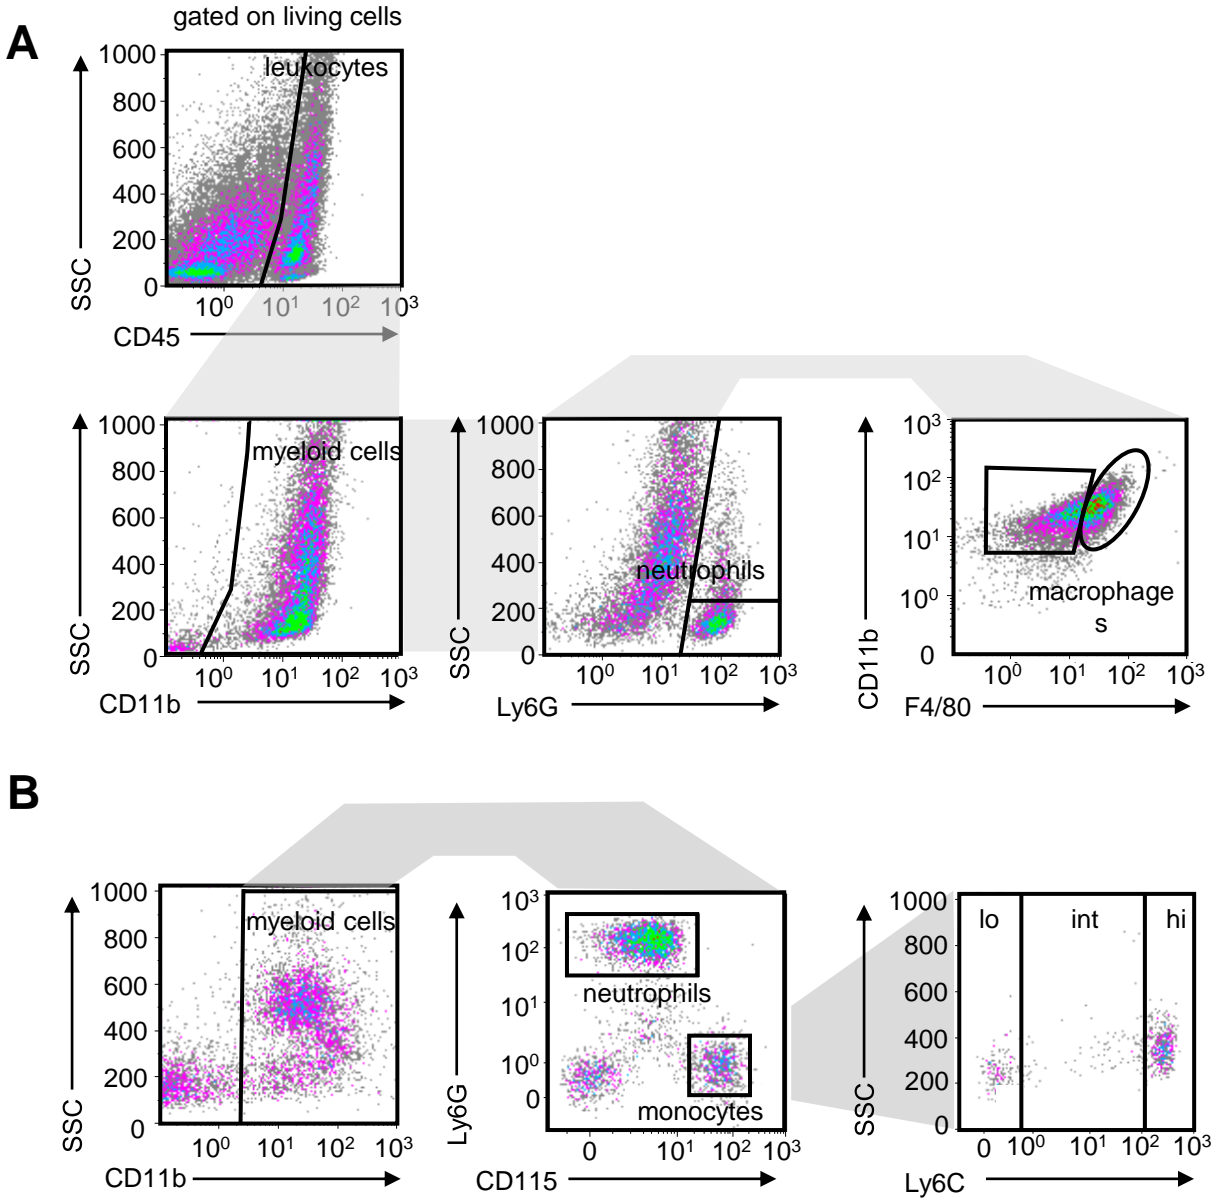

**Figure S2. Gating scheme showing flow-cytometric analysis of cardiac tissue, spleen and blood. A, heart. B, blood and spleen.**

# Supplementary Figure S3

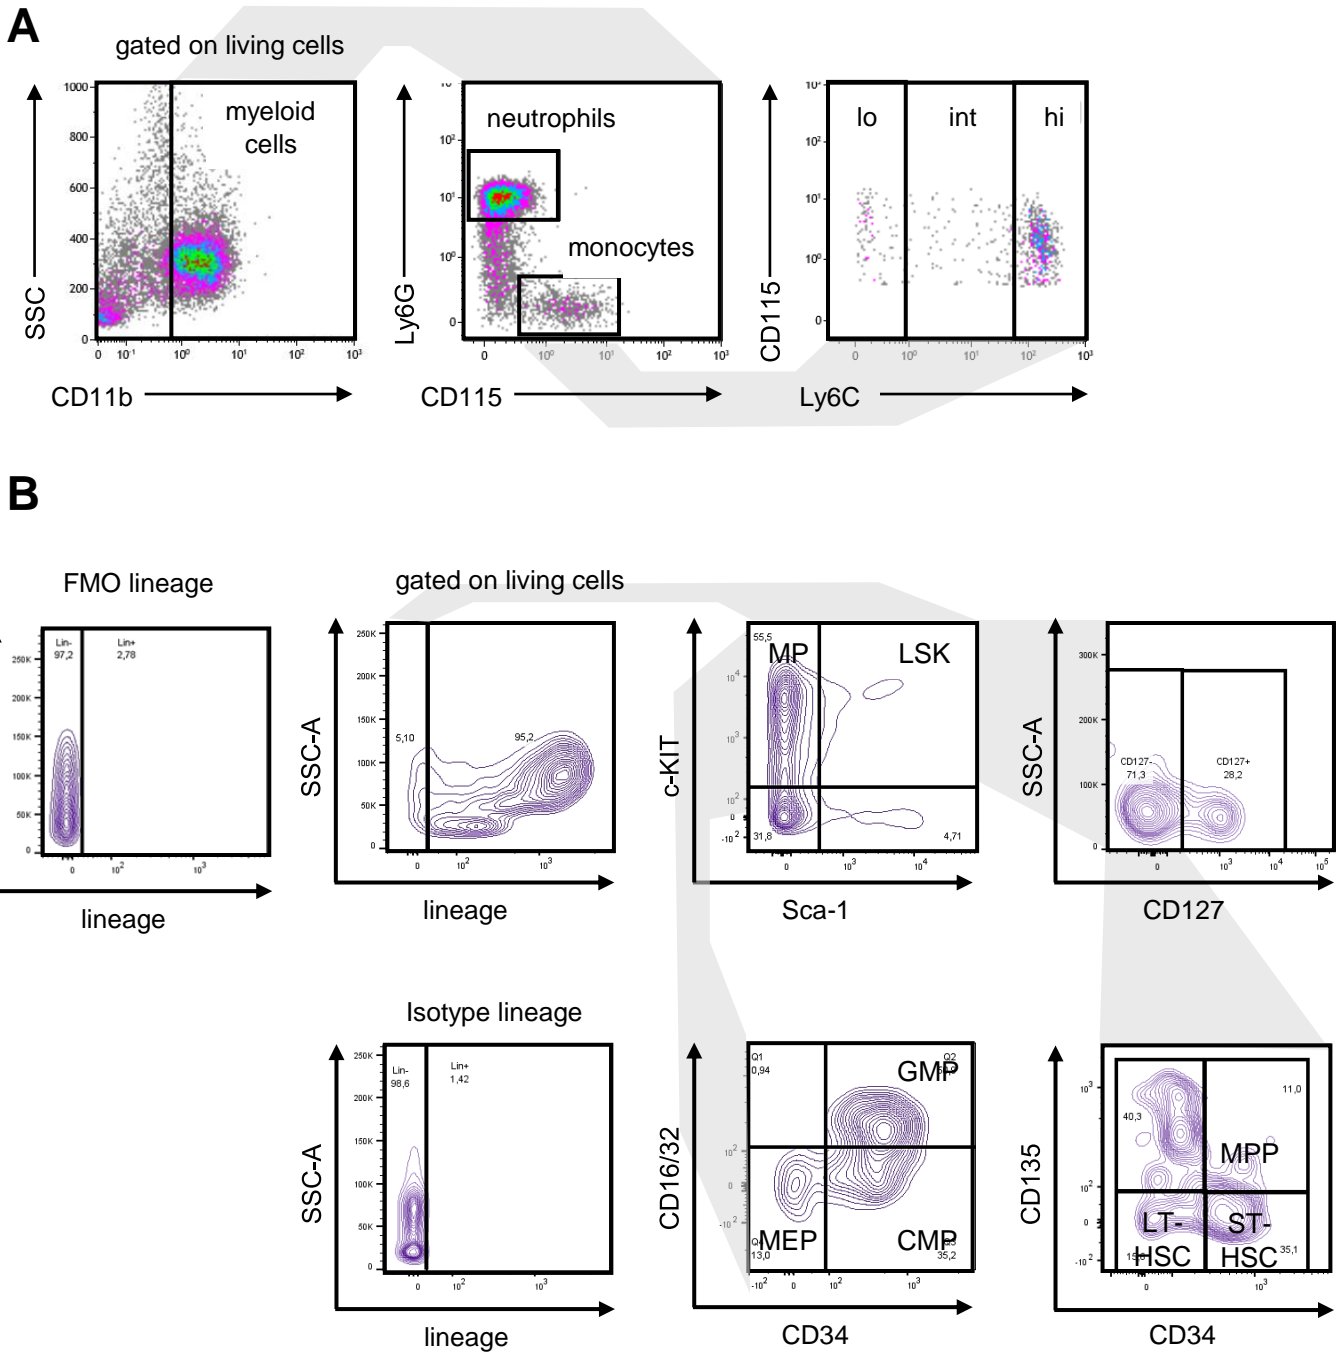

**Figure S3. Gating scheme showing flow-cytometric analysis of bone marrow. A**, bone marrow myeloid cells. **B**, bone marrow hematopoietic stem and progenitor cells (PMID [19023891](https://pubmed.ncbi.nlm.nih.gov/19023891/)). CMP = common myeloid progenitor cells; GMP = granulocyte-monocyte progenitor cells; LT-HSCs = long term hematopoietic stem cells; MEPs = megakaryocyte-erythrocyte progenitor cells; MP = myeloid progenitor cells; MPP = multipotent progenitor cells; ST-HSCs = short term hematopoietic stem cells.

# Supplementary Figure S4

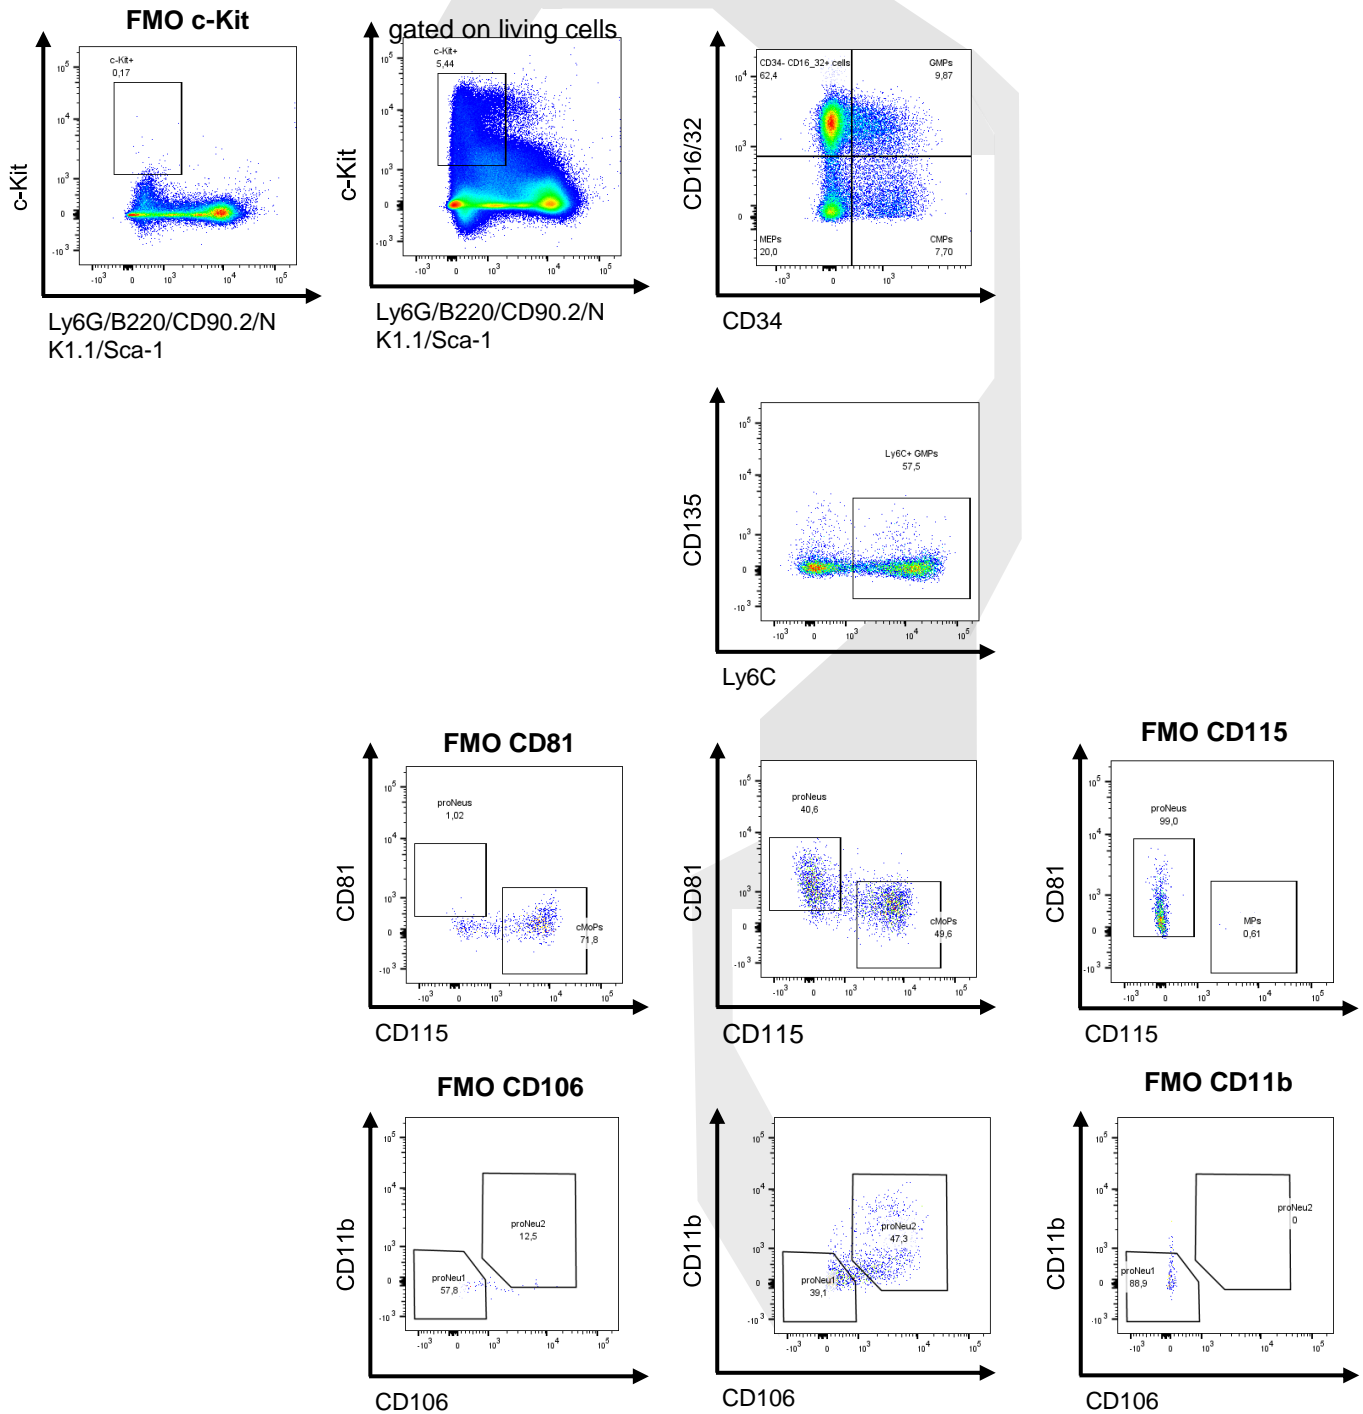

**Figure S4. Gating scheme showing flow-cytometric analysis of bone marrow.** CMP = common myeloid progenitor cells; GMP = granulocyte-monocyte progenitor cells; MEPs = megakaryocyte-erythrocyte progenitor cells; cMoP= common monocyte progenitor, proNeu = proNeutrophile. FMO indicates fluorescence minus one control

# Supplementary Figure S5

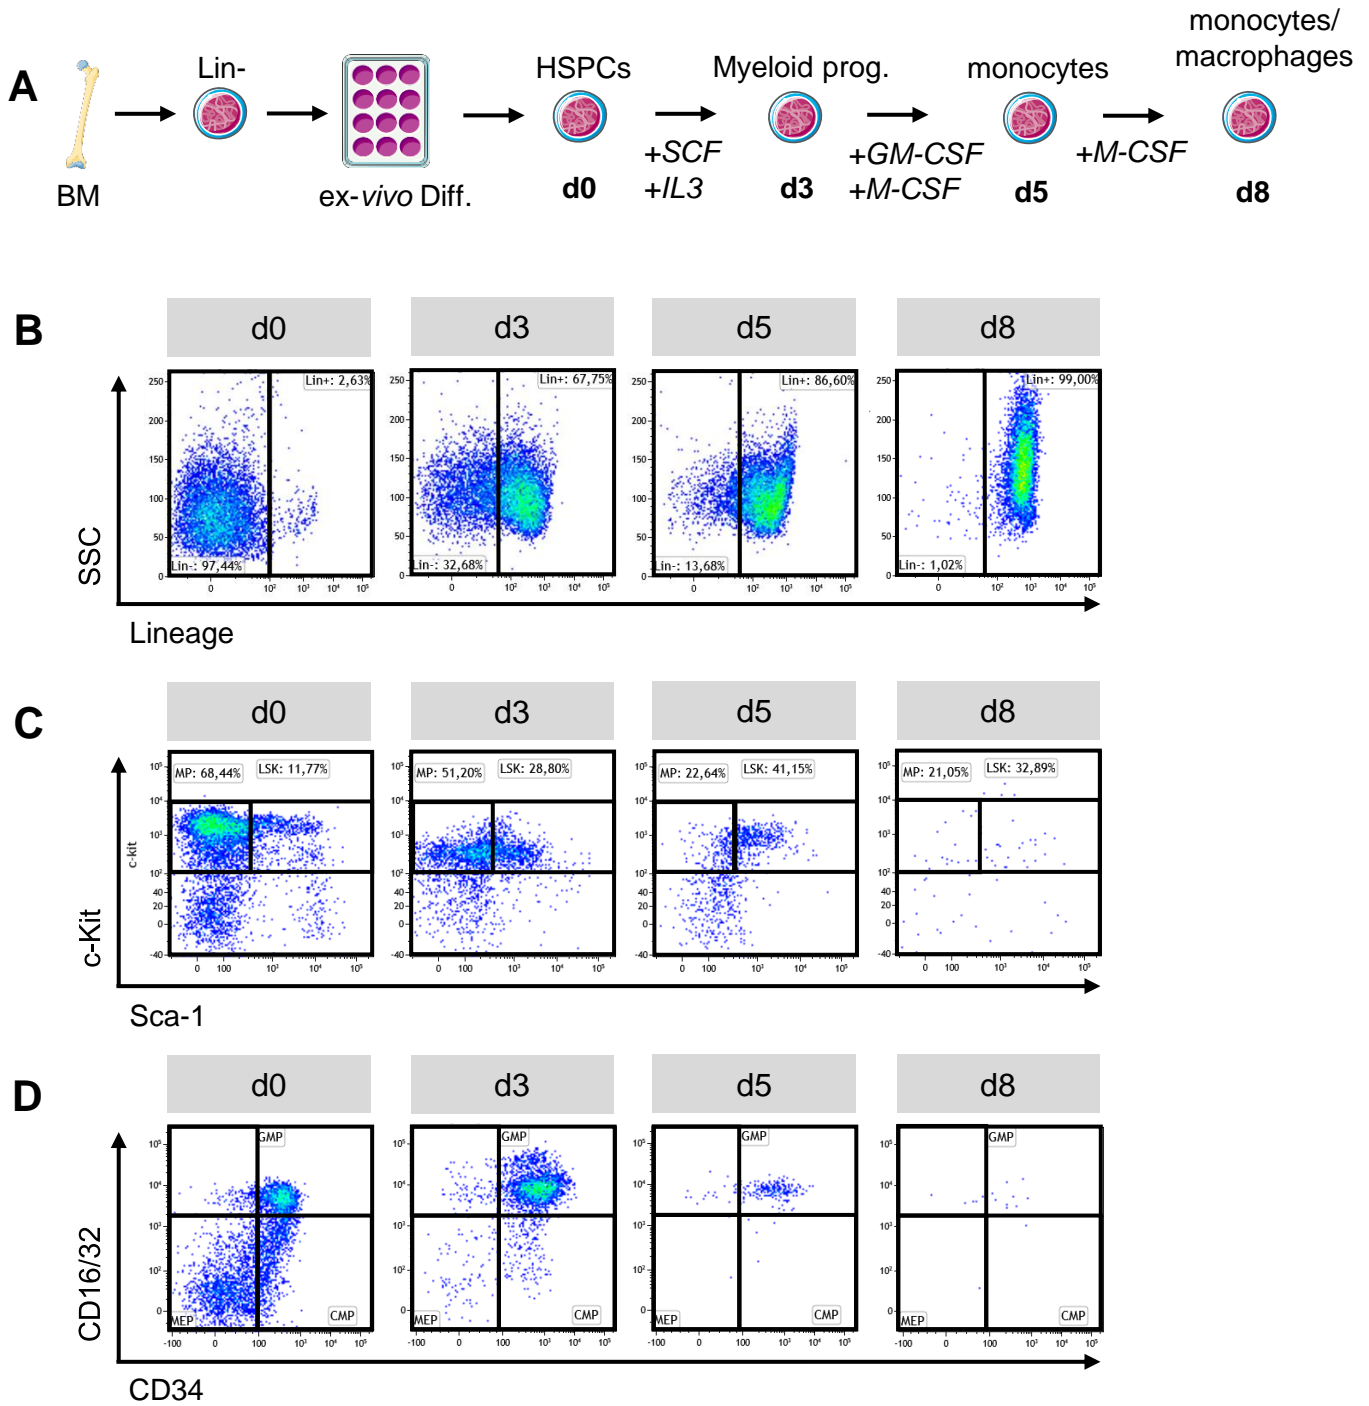

**Figure S5. Loss of hematopoietic progenitor markers during *ex-vivo* differentiation into monocytes/macrophages.** Bone marrow aspirates from wild-type (WT) mice were sorted via immunomagnetic bead separation. Lineage-depleted cells were differentiated *ex-vivo* into monocytes/macrophages. Differentiation stages were monitored by flow cytometry. **A**, experimental outline. Representative flow plots of **B**, lineage positive cells, **C**, myeloid progenitors (cKIT<sup>+</sup>Sca1<sup>-</sup>) and LSK cells (Lin<sup>-</sup>cKIT<sup>+</sup>Sca1<sup>+</sup>), **D**, megakaryocyte-erythrocyte progenitors (MEPs; Lin<sup>-</sup>cKIT<sup>+</sup>Sca1<sup>-</sup>CD34<sup>-</sup>CD16/32<sup>-</sup>), common myeloid progenitors (CMPs; Lin<sup>-</sup>cKIT<sup>+</sup>Sca1<sup>-</sup>CD34<sup>+</sup>CD16/32<sup>-</sup>) and granulocyte-monocyte progenitors (GMPS; Lin<sup>-</sup>cKIT<sup>+</sup>Sca1<sup>-</sup>CD34<sup>+</sup>CD16/32<sup>+</sup>) at day 0, 3, 5 and 8 of differentiation. Flow plots are gated on **B**, living cells, **C**, Lineage<sup>-</sup> cells, **D**, myeloid progenitors.

# Supplementary Figure S6

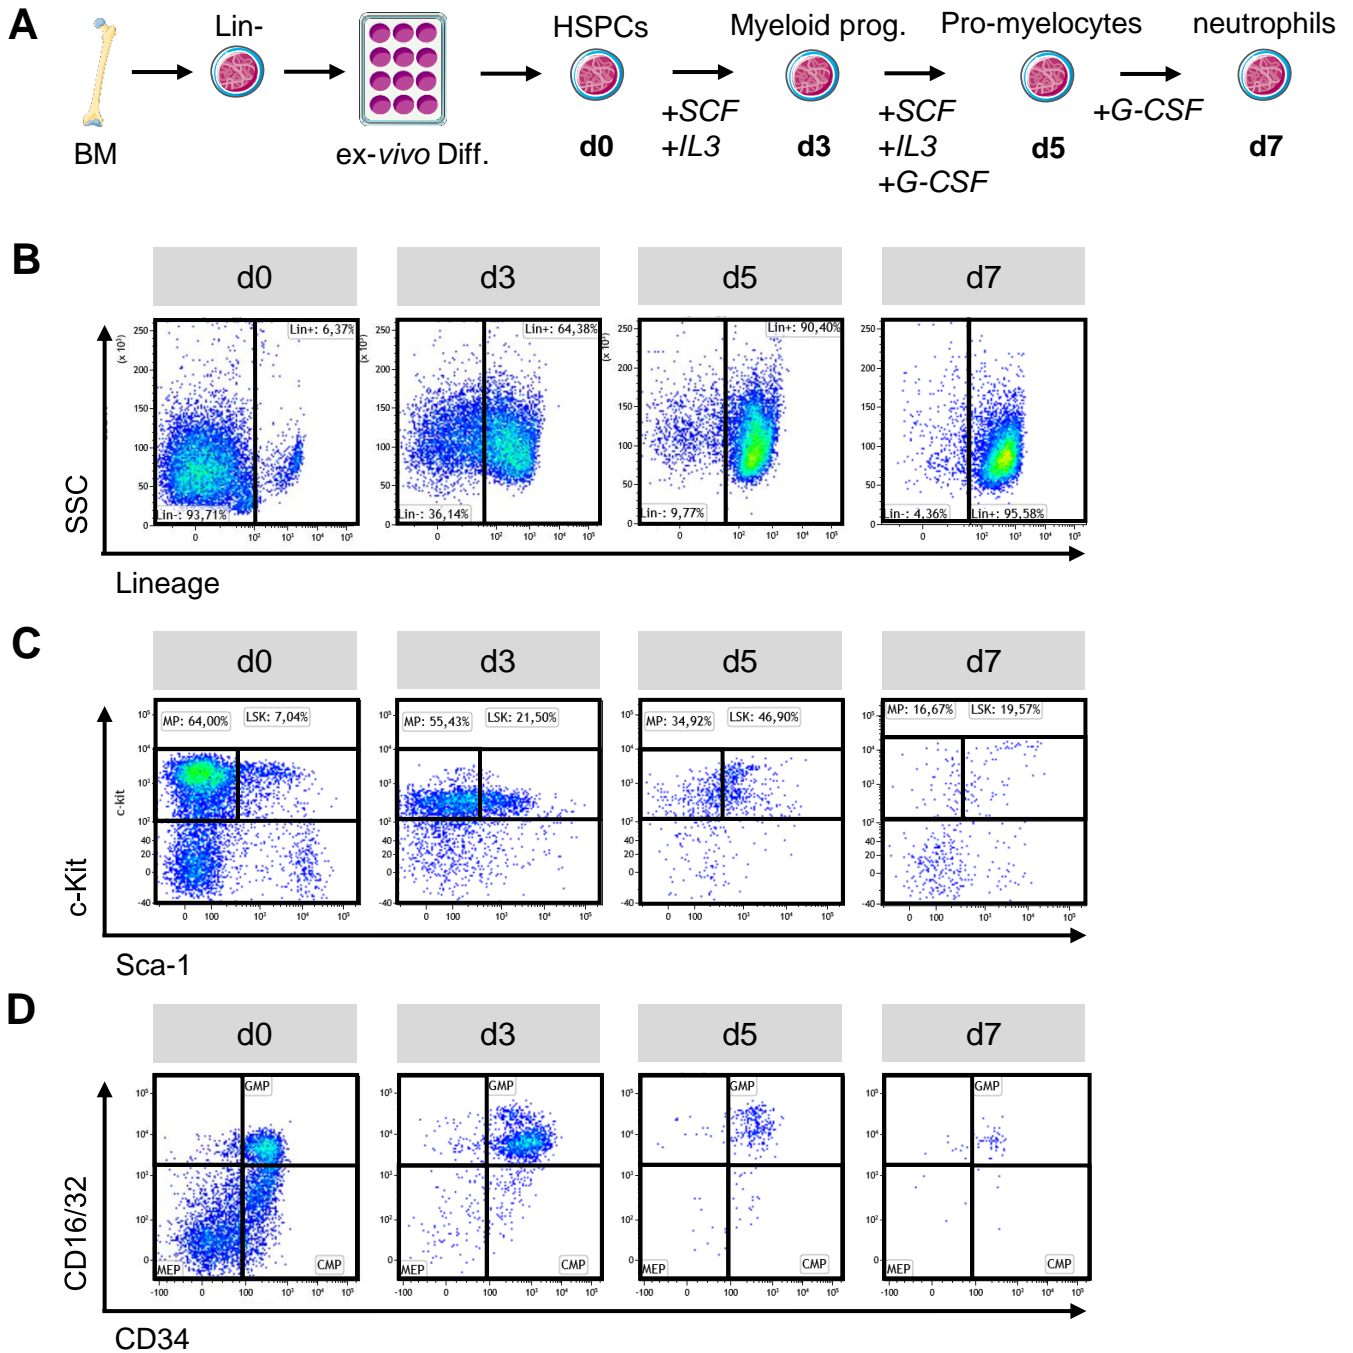

**Figure S6. Loss of hematopoietic progenitor markers during ex-vivo differentiation into neutrophils.** Bone marrow aspirates from wild-type (WT) mice were sorted via immunomagnetic bead separation using a Lineage cell depletion Kit. Lineage-depleted cells were differentiated ex-vivo into neutrophils. Differentiation stages were monitored by flow cytometry. **A**, experimental outline. Representative flow plots of **B**, lineage positive cells, **C**, myeloid progenitors (cKIT<sup>+</sup>Sca1<sup>+</sup>) and LSK cells (Lin<sup>-</sup>cKIT<sup>+</sup>Sca1<sup>+</sup>), **C**, megakaryocyte-erythrocyte progenitors (MEPs; Lin<sup>-</sup>cKIT<sup>+</sup>Sca1<sup>+</sup>CD34<sup>-</sup>CD16/32<sup>-</sup>), common myeloid progenitors (CMPs; Lin<sup>-</sup>cKIT<sup>+</sup>Sca1<sup>+</sup>CD34<sup>+</sup>CD16/32<sup>-</sup>) and granulocyte-monocyte progenitors (GMPs; Lin<sup>-</sup>cKIT<sup>+</sup>Sca1<sup>+</sup>CD34<sup>+</sup>CD16/32<sup>+</sup>) at day 0, 3, 5 and 7 of differentiation. Flow plots are gated on **A**, living cells, **B**, Lineage<sup>-</sup> cells, **D**, myeloid progenitors.

# Supplementary Figure S7

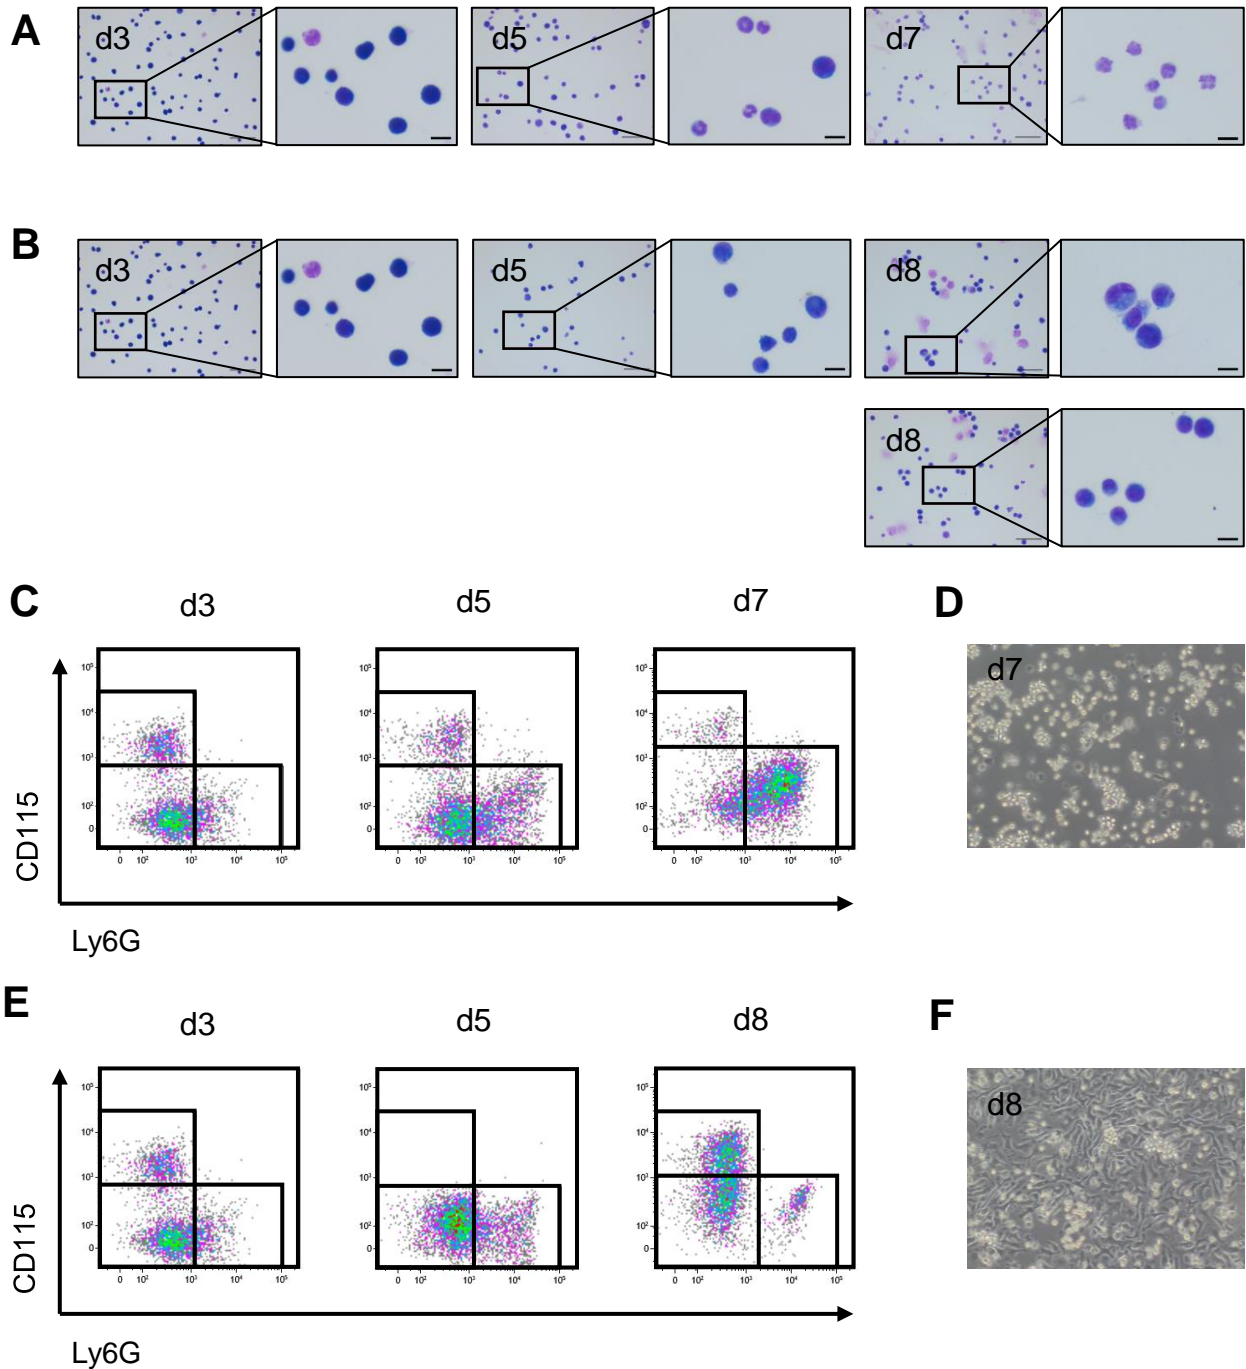

**Figure S7. Differentiation of Lineage-depleted progenitor cells into myeloid leukocyte subsets.** Bone marrow aspirates from wild-type (WT) mice were sorted via immunomagnetic bead separation. Lineage-depleted cells were differentiated *ex-vivo* into myeloid leukocytes. Representative Giemsa staining of cells at day 3, 5 and 7/8 during differentiation into **(A)** neutrophils and **(B)** monocytes/macrophages. Bars represent 50 $\mu$ m for overview images and 10 $\mu$ m for region of interests. Representative flow plots of **C**, neutrophil differentiation and **D**, respective microscopic picture of cells at day 7. Representative flow plots of **E**, monocyte/macrophage differentiation and **F**, respective microscopic picture of cells at day 8.



# Supplementary Figure S8

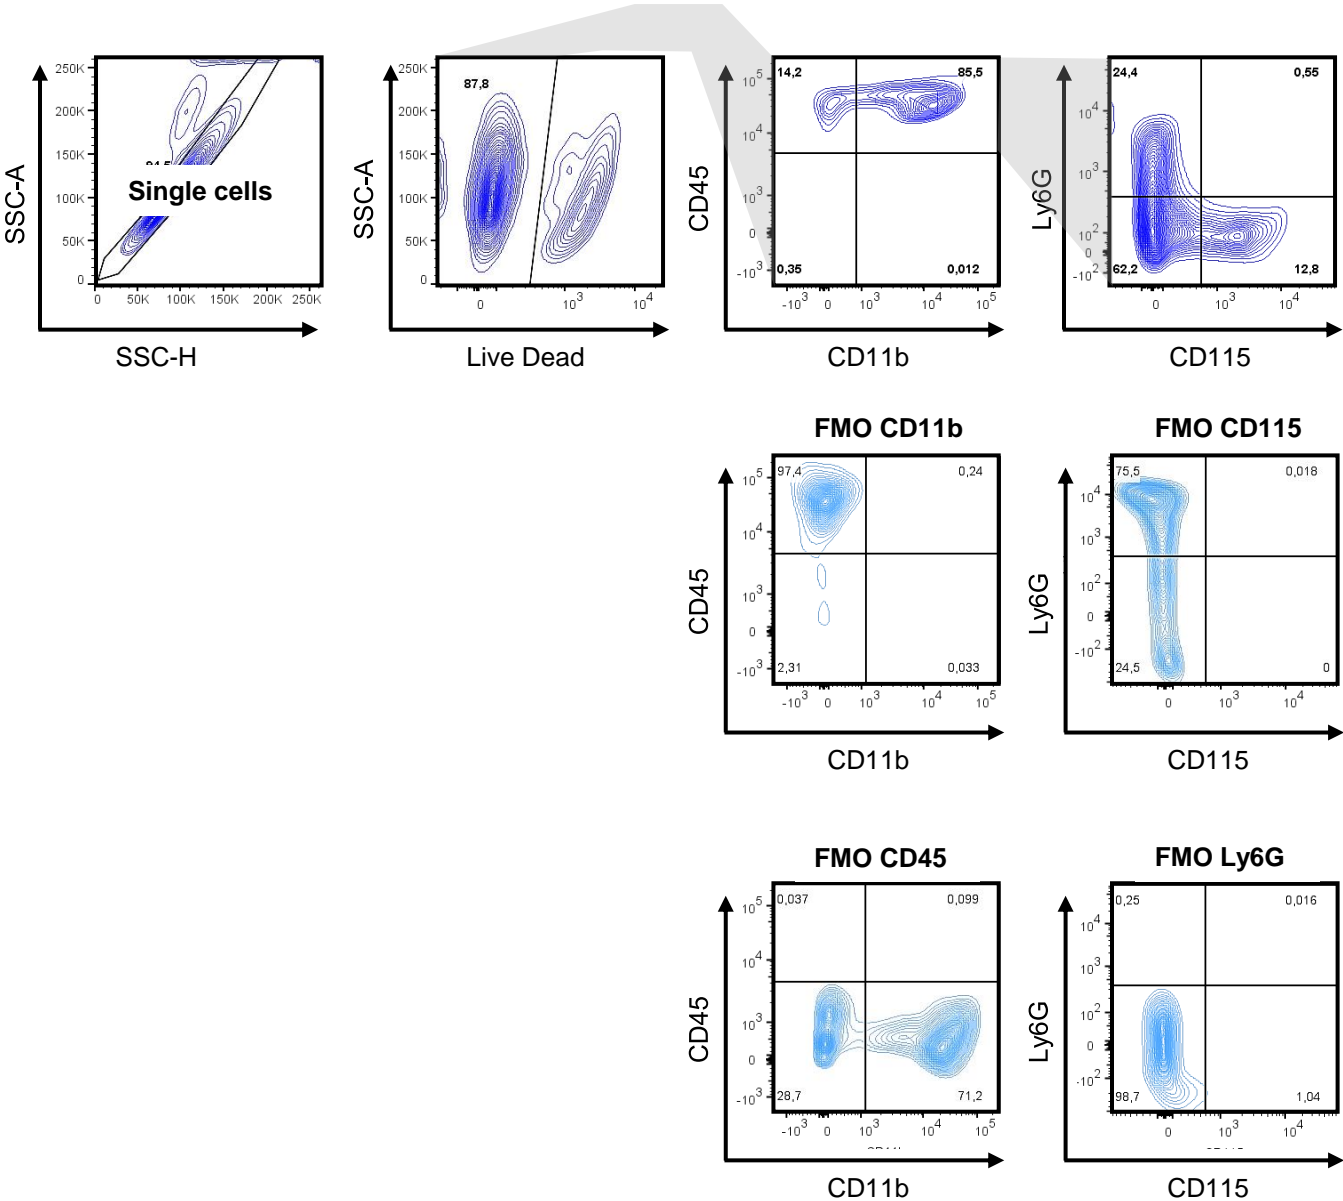

**Figure S8. Gating scheme showing flow-cytometric analysis of bone marrow derived leukocytes. FMO indicates fluorescence minus one control.**



# Supplementary Figure S9

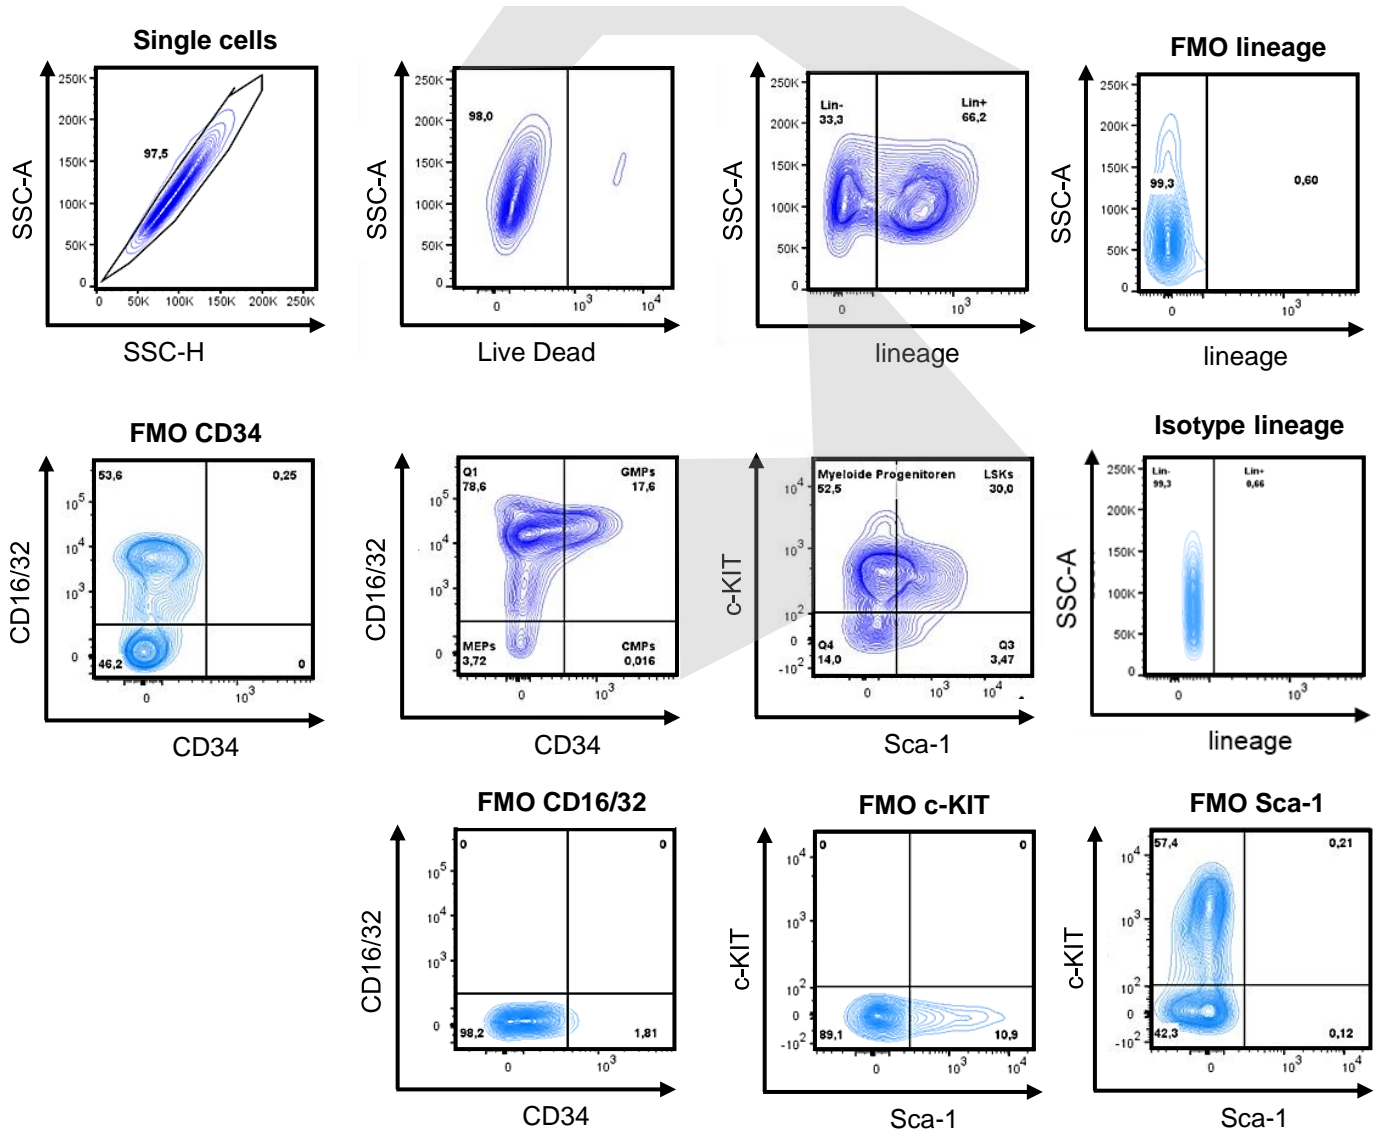

**Figure S9. Gating scheme showing flow-cytometric analysis of bone marrow derived hematopoietic stem and progenitor cells. FMO indicates fluorescence minus one control.**

# Supplementary Figure S10

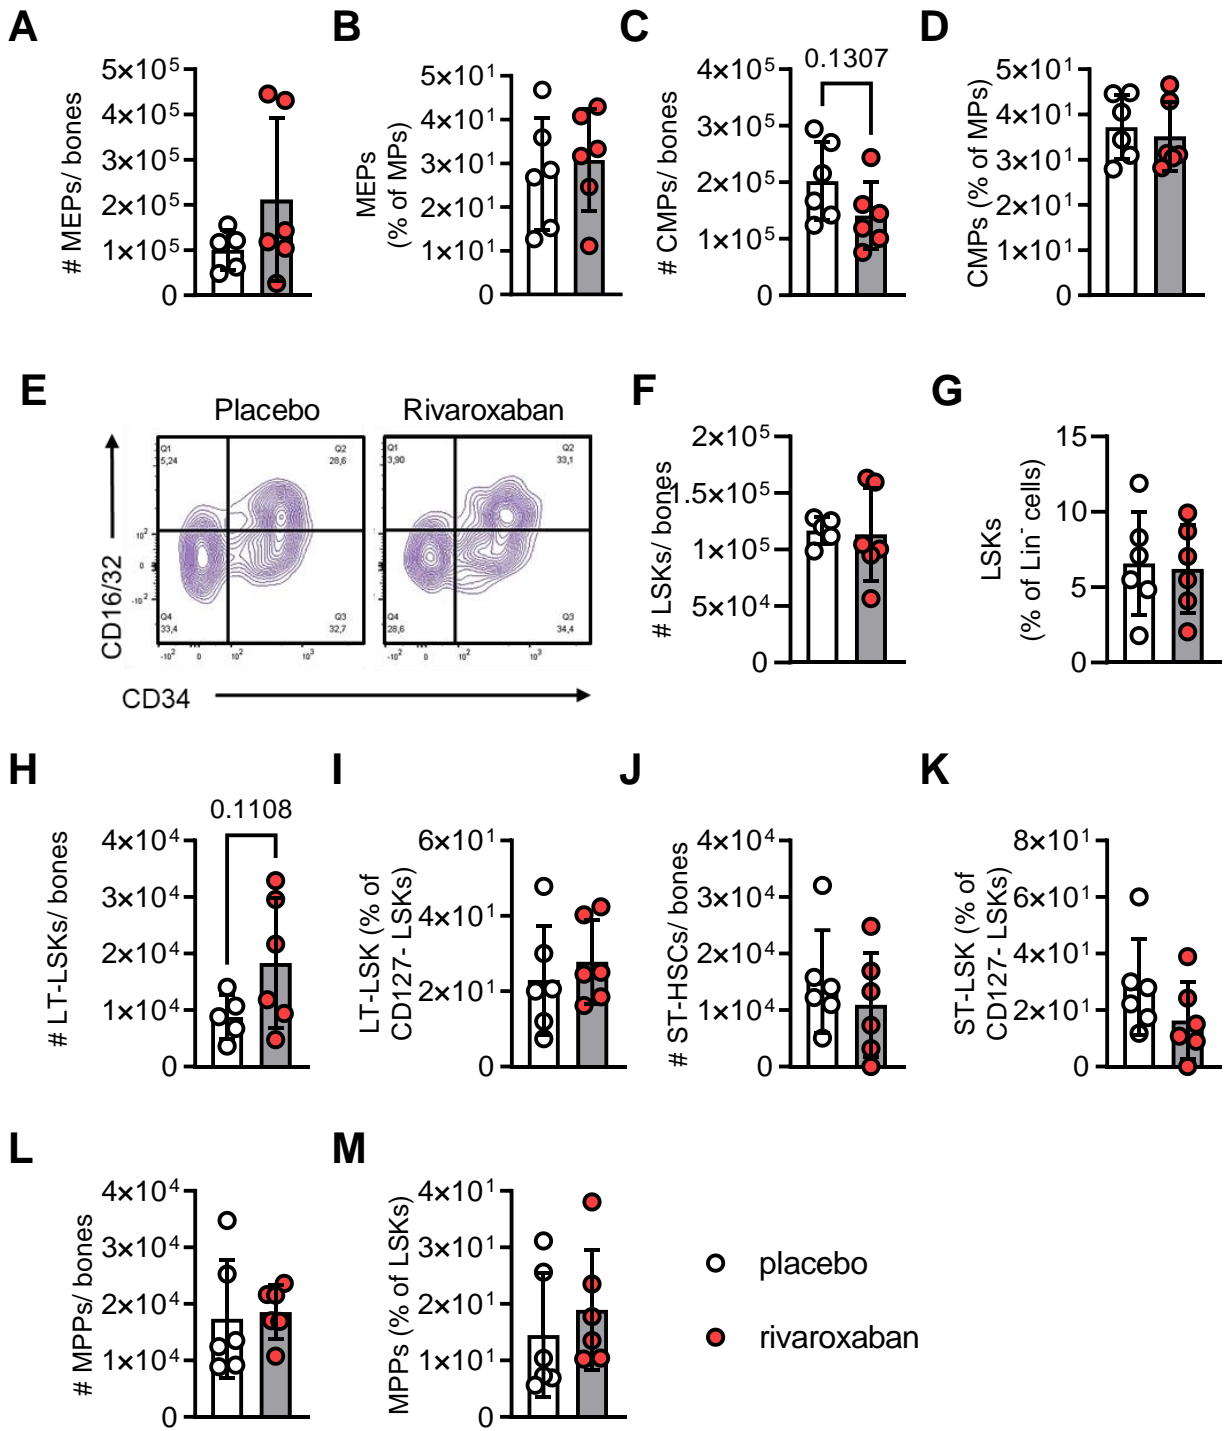

**Figure S10. Treatment with rivaroxaban does not alter hematopoietic stem and progenitor cells in the bone marrow.** Flow-cytometric analysis the bone marrow from tibiae and femora after 7 days of feeding with rivaroxaban or placebo. Quantification of **A-B**, megakaryocyte-erythrocyte progenitor cells (MEPs; Lin<sup>-</sup>Sca1<sup>-</sup>c-KIT<sup>+</sup>CD34<sup>-</sup>CD16/32<sup>+</sup>); **C-D** common myeloid progenitor cells (CMPs; Lin<sup>-</sup>Sca1<sup>-</sup>c-KIT<sup>+</sup>CD34<sup>+</sup>CD16/32<sup>-</sup>) and **E**, representative flow plot. Quantification of **F-G**, LSKs cells ((Lin<sup>-</sup>)eage<sup>-</sup>Sca1<sup>+</sup>c-KIT<sup>+</sup>), **H-I** long term hematopoietic stem cells (LT-HSCs; Lin<sup>-</sup>Sca1<sup>+</sup>c-KIT<sup>+</sup>CD127<sup>-</sup>CD34<sup>-</sup>CD135<sup>-</sup>), **J-K** short term hematopoietic stem cells (ST-HSCs; Lin<sup>-</sup>Sca1<sup>+</sup>c-KIT<sup>+</sup>CD127<sup>-</sup>CD34<sup>+</sup>CD135<sup>-</sup>), **L-M** multipotent progenitor cells (MPPs; Lin<sup>-</sup>Sca1<sup>+</sup>c-KIT<sup>+</sup>CD127<sup>-</sup>CD34<sup>+</sup>CD135<sup>+</sup>). n = 5-6. Data represent mean ± SD; \*P < 0.05 vs. Placebo, two-tailed unpaired Student's t-test. # indicates absolute cell numbers.

# Supplementary Figure S11

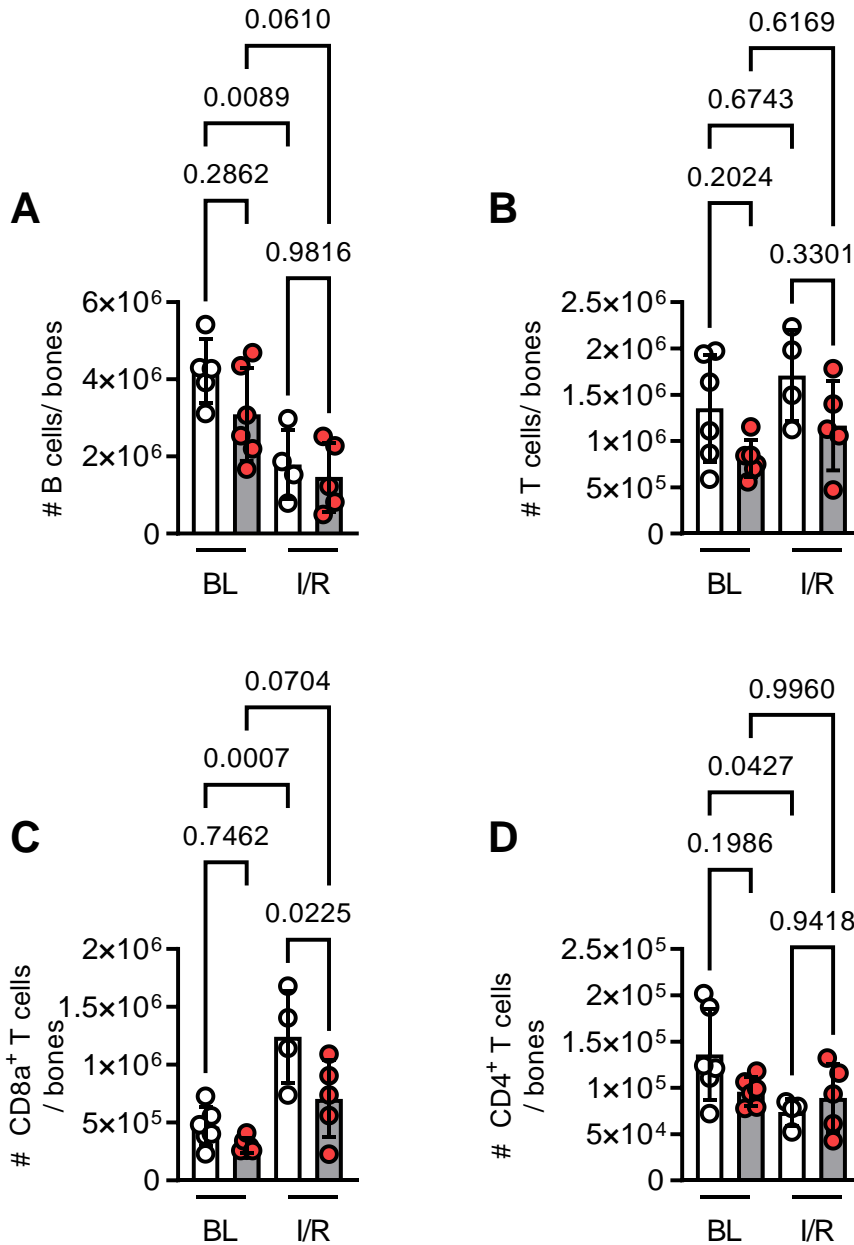

**Figure S11. Bone marrow lymphocytes at steady state and 72 hours post I/R.** C57BL6/J mice were treated with placebo or rivaroxaban for seven days and then subjected to cardiac I/R injury. Flow cytometric analysis of the bone marrow (BM) from tibiae and femora at baseline and 72 hours after I/R. **A**, B cells (CD45<sup>+</sup>CD19<sup>+</sup>), **B**, T cells (CD45<sup>+</sup>CD3<sup>+</sup>), **C**, CD8a<sup>+</sup> T cells (CD45<sup>+</sup>CD3<sup>+</sup>CD8a<sup>+</sup>), **D**, CD4<sup>+</sup> T cells (CD45<sup>+</sup>CD3<sup>+</sup>CD4<sup>+</sup>) shown as absolute cell numbers (#); n = 4-6. Data represent mean ± SD; \*P < 0.05 vs. placebo; Statistical significance was determined by Ordinary one-way ANOVA followed by Sidak post hoc test.

# Supplementary Figure S12

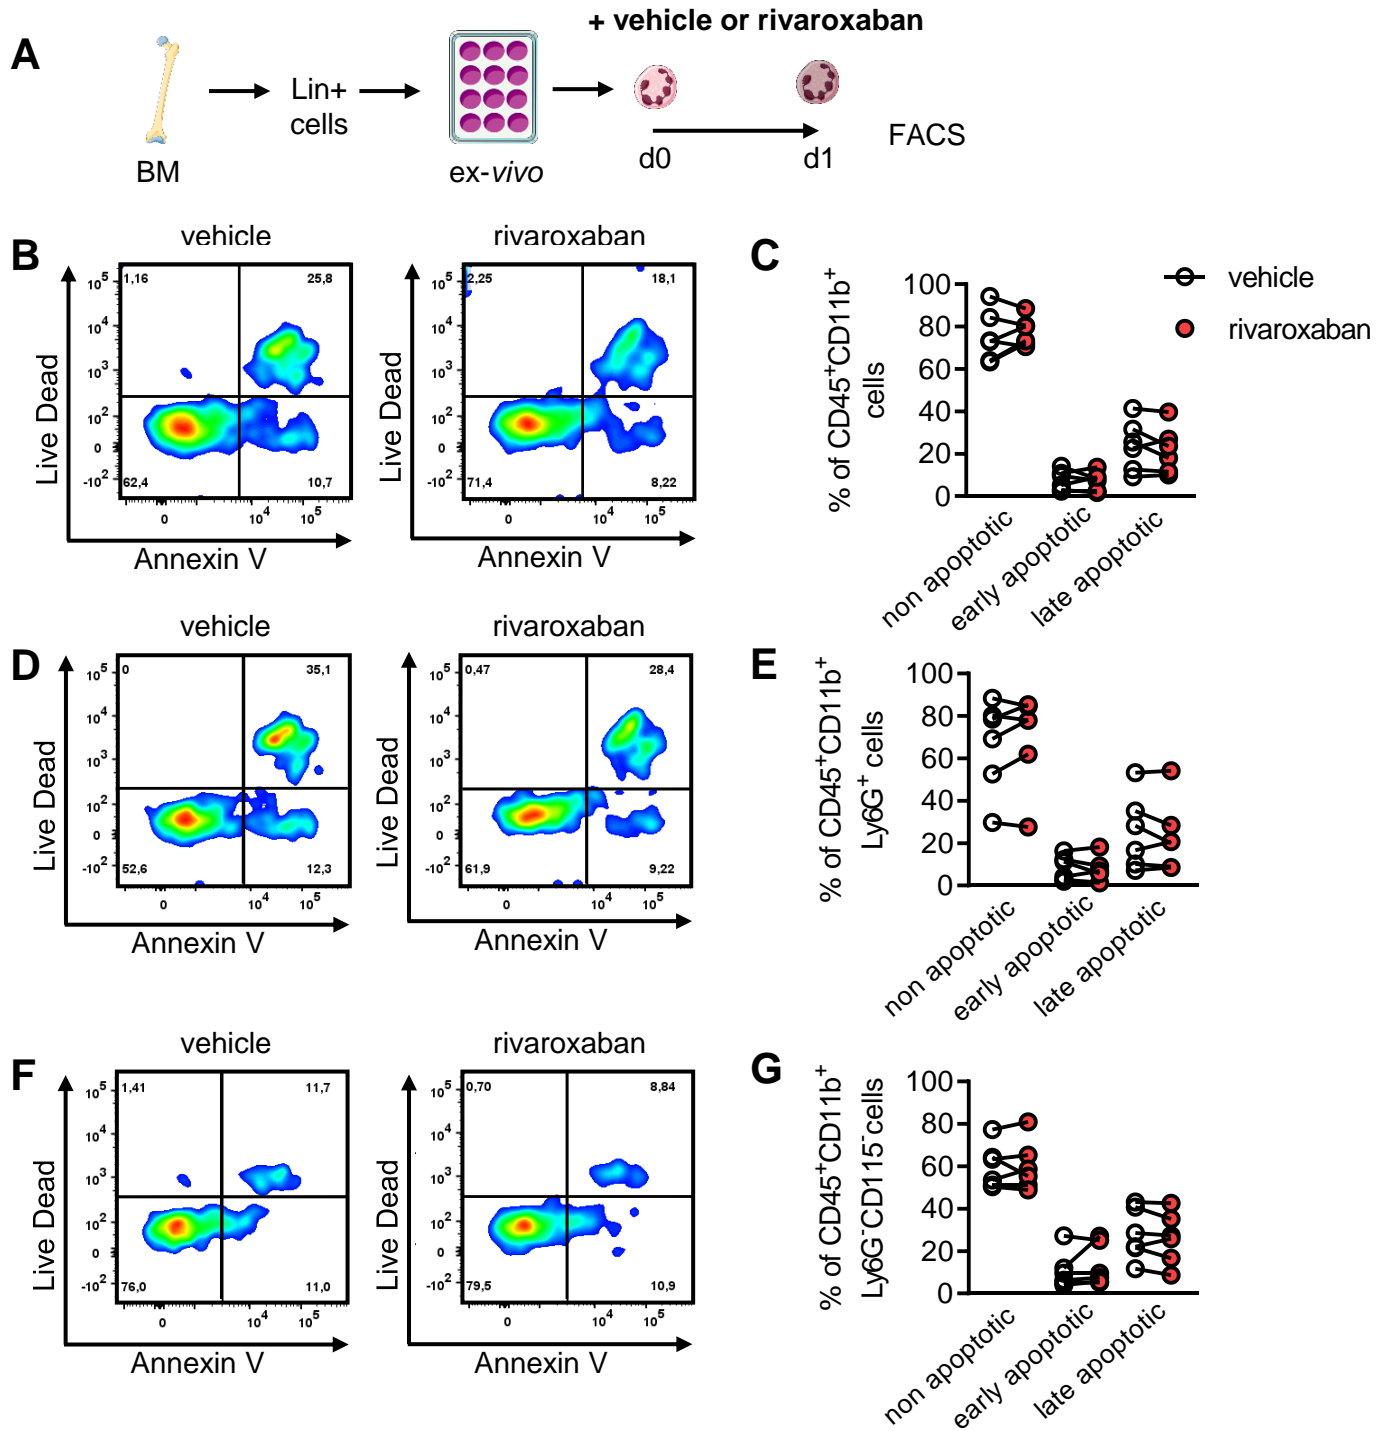

**Figure S12. Apoptosis in bone marrow derived mature myeloid cells is not increased by rivaroxaban.** **A**, experimental outline. Bone marrow aspirates from C57BL/6J mice were sorted for mature leukocytes (Lineage<sup>+</sup>) using immunomagnetic bead separation. To test the impact of rivaroxaban on apoptosis, leukocytes were cultivated ex-vivo with vehicle or 10 $\mu$ M rivaroxaban for 24 hours followed by flow-cytometry. Combined Annexin V/Live Dead (LD) staining was used to determine non-apoptotic (Annexin<sup>-</sup>LD<sup>-</sup>), early apoptotic (Annexin<sup>+</sup>LD<sup>-</sup>) and late apoptotic (Annexin<sup>+</sup>LD<sup>+</sup>) cells. **B**, flow plots and **C**, quantification of myeloid leukocytes (CD45<sup>+</sup>CD11b<sup>+</sup>). **D**, flow plots and **E**, quantification of neutrophils (CD45<sup>+</sup>CD11b<sup>+</sup>Ly6G<sup>+</sup>). **F**, flow plots and **G**, quantification of Ly6G<sup>-</sup>CD115<sup>-</sup> myeloid cells (CD45<sup>+</sup>CD11b<sup>+</sup>Ly6G<sup>-</sup>CD115<sup>-</sup>); n = 6. Data represent symbols and lines.

# Supplementary Figure S13

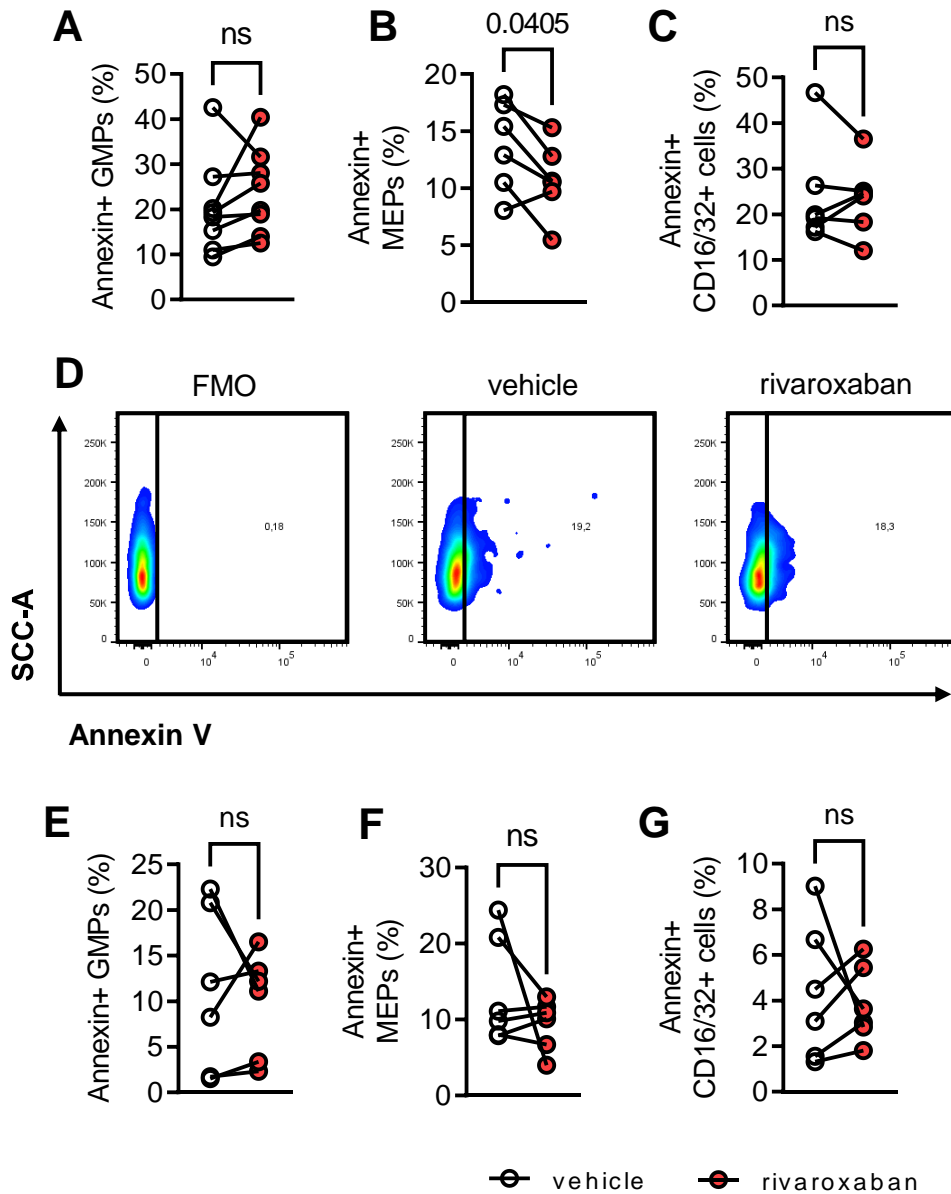

**Figure S13. Impact of Rivaroxaban on apoptosis in myeloid progenitor cells after 24 and 72 hours of differentiation.** Ex-vivo differentiation of bone marrow derived (Lin)<sup>-</sup>eage<sup>-</sup> cells into myeloid progenitors (MPs). Cells were treated with vehicle or 10  $\mu$ M rivaroxaban for 24 or 72 hours and harvested for flow-cytometric analyses. Annexin V staining was used to determine **A**, apoptotic granulocyte-monocyte progenitor cells (GMPs; Lin<sup>-</sup>Sca1<sup>-</sup>c-KIT<sup>+</sup>CD34<sup>+</sup>CD16/32<sup>+</sup>), **B**, apoptotic megakaryocyte-erythrocyte progenitors (MEPs; Lin<sup>-</sup>Sca1<sup>-</sup>c-KIT<sup>+</sup>CD34<sup>-</sup>CD16/32<sup>-</sup>), **C**, apoptotic CD34<sup>-</sup>CD16/32<sup>+</sup> cells (Lin<sup>-</sup>Sca1<sup>-</sup>c-KIT<sup>+</sup>CD34<sup>-</sup>CD16/32<sup>+</sup>) after 24 h of differentiation shown as percentages. **D**, Representative flow plots of apoptotic CD34<sup>-</sup>CD16/32<sup>+</sup> cells. **E**, apoptotic granulocyte-monocyte progenitor cells (GMPs; Lin<sup>-</sup>Sca1<sup>-</sup>c-KIT<sup>+</sup>CD34<sup>+</sup>CD16/32<sup>+</sup>), **F**, apoptotic megakaryocyte-erythrocyte progenitors (MEPs; Lin<sup>-</sup>Sca1<sup>-</sup>c-KIT<sup>+</sup>CD34<sup>-</sup>CD16/32<sup>-</sup>), **G**, apoptotic CD34<sup>-</sup>CD16/32<sup>+</sup> cells (Lin<sup>-</sup>Sca1<sup>-</sup>c-KIT<sup>+</sup>CD34<sup>-</sup>CD16/32<sup>+</sup>) after 72 h of differentiation shown as percentages. Data represent symbols and lines. \* $P < 0.05$ , paired t-test. FMO indicates fluorescence minus one control.

# Supplementary Figure S14

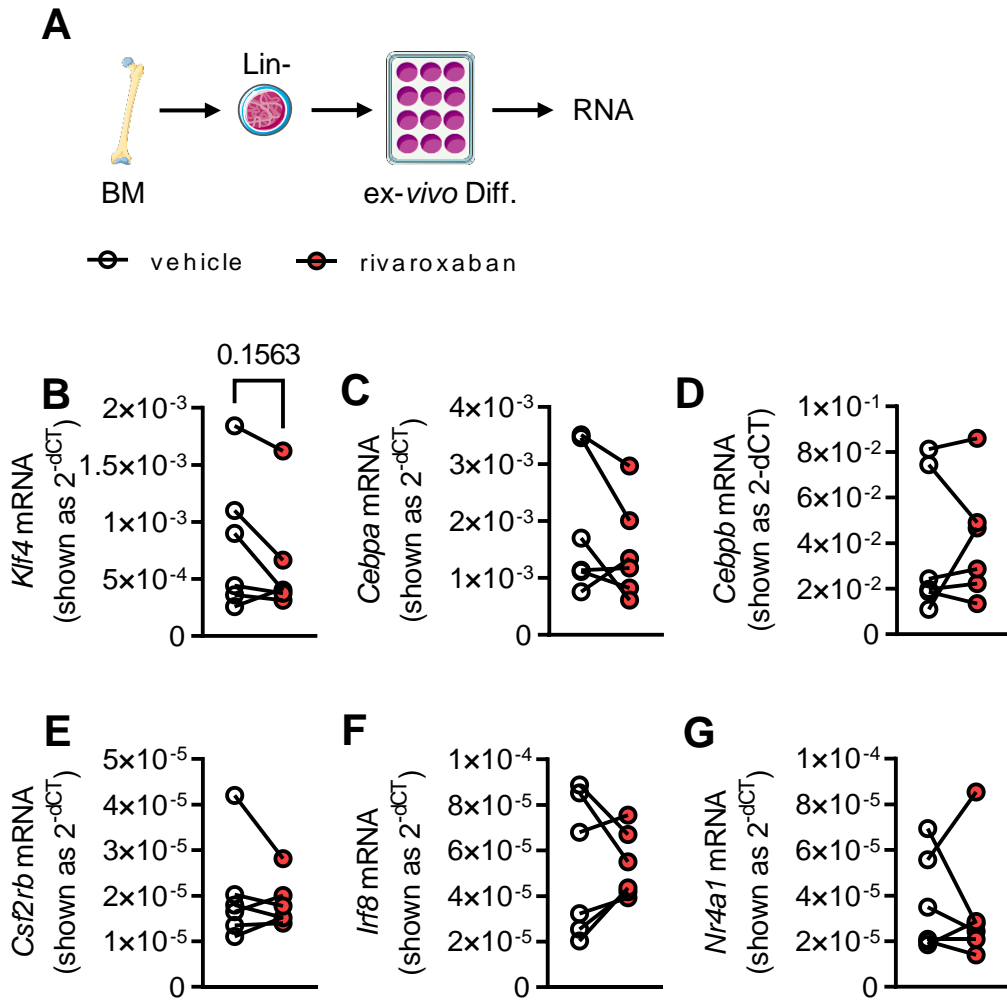

**Figure S14. Rivaroxabans effect on transcription factors promoting GMP to myeloid leukocyte differentiation.** **A**, experimental outline showing *ex-vivo* differentiation of bone marrow derived (Lin)<sup>+</sup> cells into myeloid progenitors (MPs) (d3). Cells were treated with vehicle or 10  $\mu$ M rivaroxaban and harvested for RNA isolation followed by semi-quantitative *realtime* PCR. n = 6. mRNA expression of **B**, krüppel like factor (*Klf4*), **C**, CCAT enhancer binding protein alpha (*Cebpa*), **D**, *Cebpb*, **E**, *Csf2rb*, **F**, interferon regulatory factor 8 (*Irf8*) and **G**, nuclear receptor 4A1 (*Nr4a1*) shown as  $2^{-\Delta\Delta CT}$ . Data represent symbols and lines. \**P* < 0.05, paired t-test (**B**) and Wilcoxon matched-pairs signed rank test (**C**, **F**).

# Supplementary Figure S15

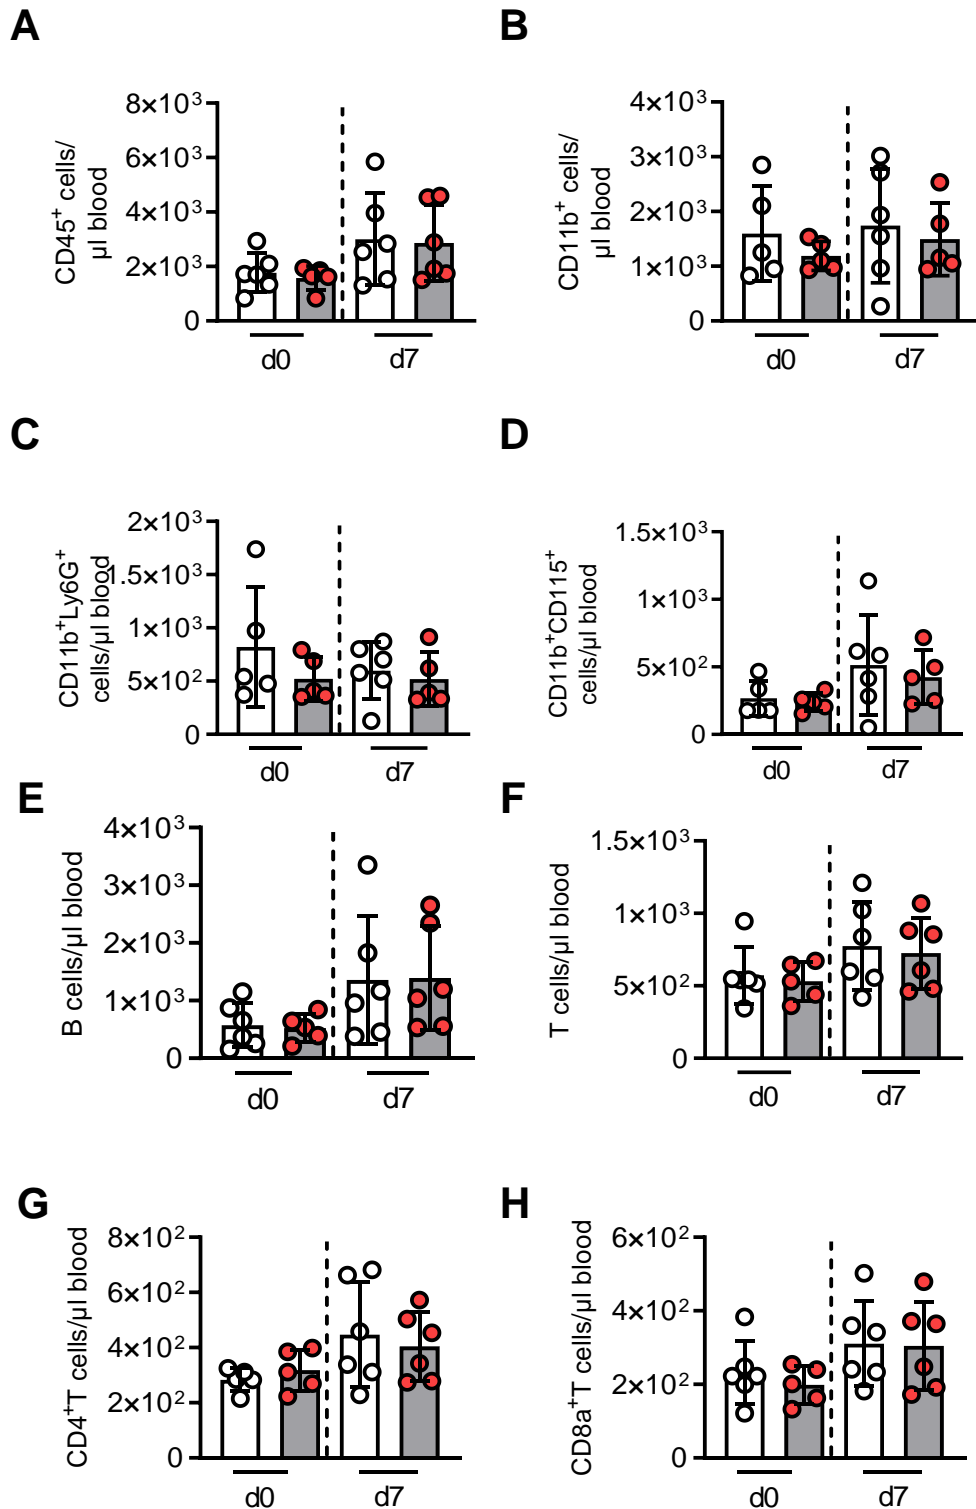

**Figure RS15. Pretreatment with rivaroxaban does not alter the number of circulating leukocytes and lymphocytes.** Flow cytometric analysis of circulating lymphocytes and myeloid leukocytes at baseline (d0) and after seven days of feeding (d7) with placebo or rivaroxaban. **A**, B cells (CD45<sup>+</sup>CD19<sup>+</sup>), **B**, T cells (CD45<sup>+</sup>CD3<sup>+</sup>), **C**, CD4<sup>+</sup> T cells (CD45<sup>+</sup>CD3<sup>+</sup>CD4<sup>+</sup>), **D**, CD8a<sup>+</sup> T cells (CD45<sup>+</sup>CD3<sup>+</sup>CD8a<sup>+</sup>), **E**, leukocytes (CD45<sup>+</sup>), **F**, myeloid leukocytes (CD11b<sup>+</sup>), **G**, neutrophils (CD11b<sup>+</sup>Ly6G<sup>+</sup>), **H**, monocytes (CD11b<sup>+</sup>CD115<sup>+</sup>) shown as cells per  $\mu$ l blood; n = 5-6. Data represent mean  $\pm$  SD.



# Supplementary Figure S16

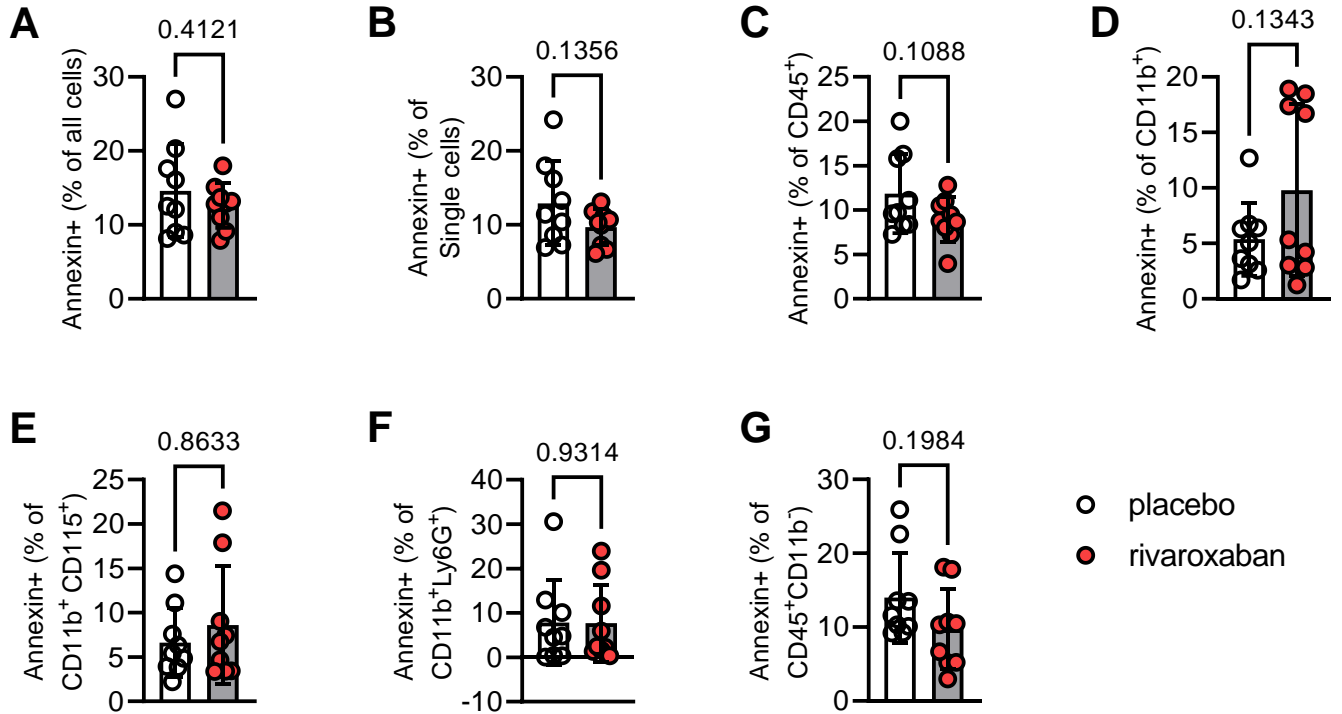

**Figure S16. Apoptosis of circulating leukocytes at steady state.** C57BL/6J mice were treated for seven days with rivaroxaban or placebo. Flow-cytometric analysis of Annexin+ cells in the bone marrow. **A**, all cells, **B**, Single cells, **C**, leukocytes (CD45<sup>+</sup>), **D**, myeloid leukocytes (CD45<sup>+</sup>CD11b<sup>+</sup>), **E**, monocytes (CD45<sup>+</sup>CD11b<sup>+</sup>CD115<sup>+</sup>), **F**, neutrophils, (CD45<sup>+</sup>CD11b<sup>+</sup>Ly6G<sup>+</sup>), **G**, lymphocytes (CD45<sup>+</sup>CD11b<sup>-</sup>) n = 9. Data represent mean ± SD, \*P < 0.05, \*\*P < 0.01. Statistical significance was determined by unpaired t-test in A-D and Mann-Whitney test in E-G.

# Supplementary Figure S17

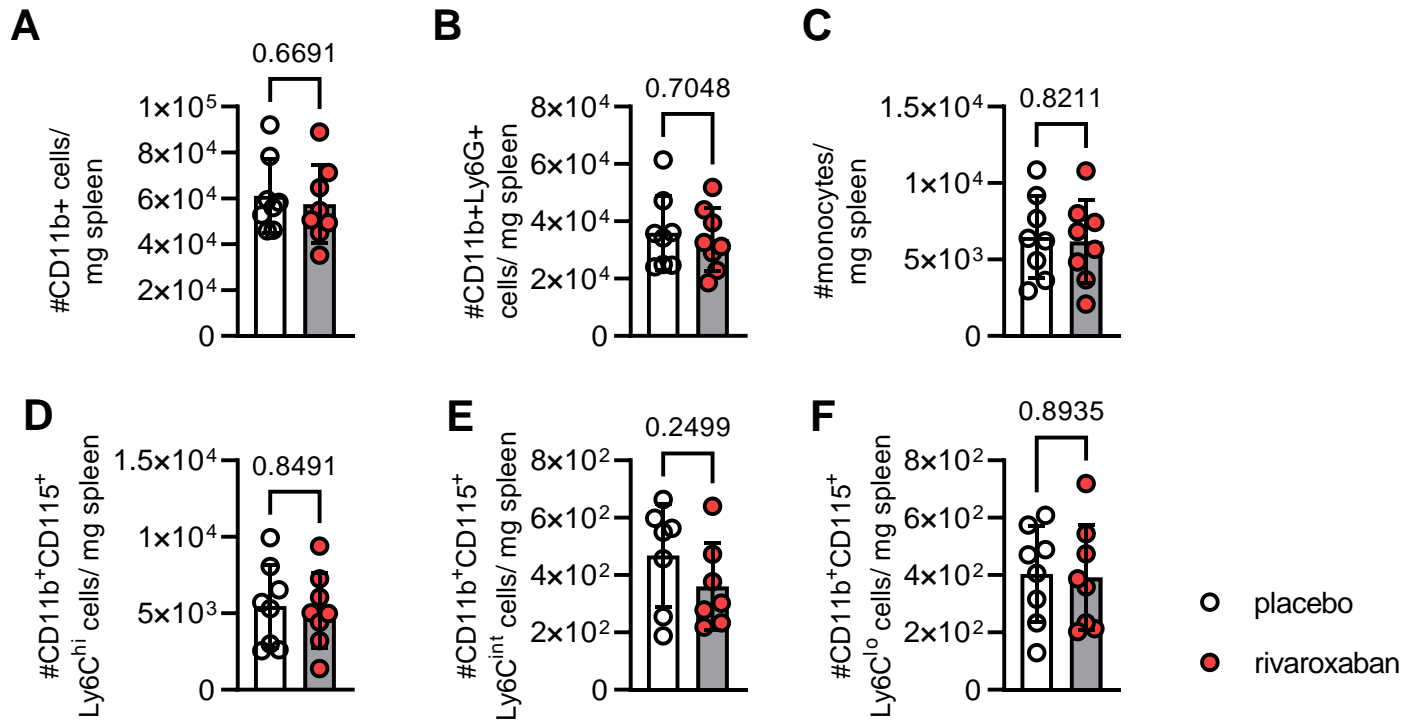

**Figure S17. Splenic myeloid leukocytes at steady state.** C57BL/6J mice were treated for seven days with rivaroxaban or placebo. Flow-cytometric analysis of myeloid leukocyte subsets in the spleen. **A**, myeloid leukocytes (CD45<sup>+</sup>CD11b<sup>+</sup>) **B**, neutrophils (CD45<sup>+</sup>CD11b<sup>+</sup>Ly6G<sup>+</sup>), **C**, monocytes (CD45<sup>+</sup>CD11b<sup>+</sup>CD115<sup>+</sup>), **D**, Ly6C<sup>high</sup> monocytes (CD45<sup>+</sup>CD11b<sup>+</sup>CD115<sup>+</sup>Ly6C<sup>high</sup>), **E**, Ly6C<sup>int</sup> monocytes (CD45<sup>+</sup>CD11b<sup>+</sup>CD115<sup>+</sup>Ly6C<sup>int</sup>), **F**, Ly6C<sup>low</sup> monocytes (CD45<sup>+</sup>CD11b<sup>+</sup>CD115<sup>+</sup>Ly6C<sup>low</sup>) shown as cells per mg tissue; n = 6. Data represent mean ± SD. ; \**P* < 0.05 vs. placebo; Statistical significance was determined by two-tailed unpaired Student's t-test.

# Supplementary Figure S18

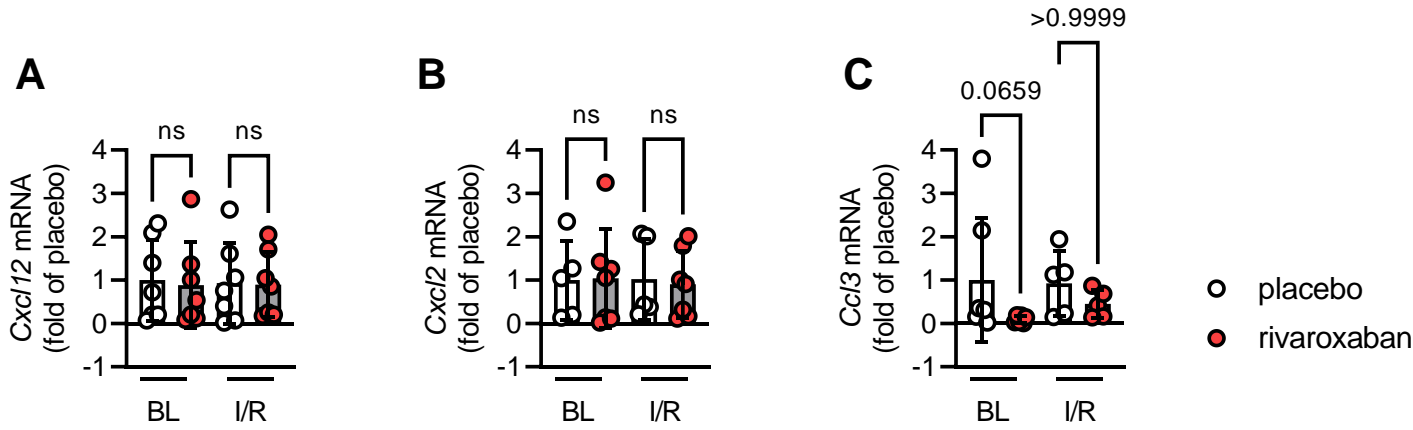

**Figure S18. Effect of Rivaroxaban on retention and mobilizing factors in *c-kit*<sup>+</sup> cells from the bone marrow.** mRNA expression of **A**, C-X-C motif chemokine 12 (*Cxcl12*), **B**, C-X-C motif chemokine 2 (*Cxc12*) and **C**, C-C motif chemokine ligand 3 (*Cc13*) at steady state (BL) and 24h hours post cardiac ischemia and reperfusion (I/R). n=5-7. Data represent mean  $\pm$  SD, \* $P < 0.05$ . Statistical significance was determined by Ordinary one-way ANOVA followed by Sidak post hoc test in **A** and Kruskal-Wallis Test followed by Dunn's multiple comparisons test in **B-C**.

# Supplementary Figure S19

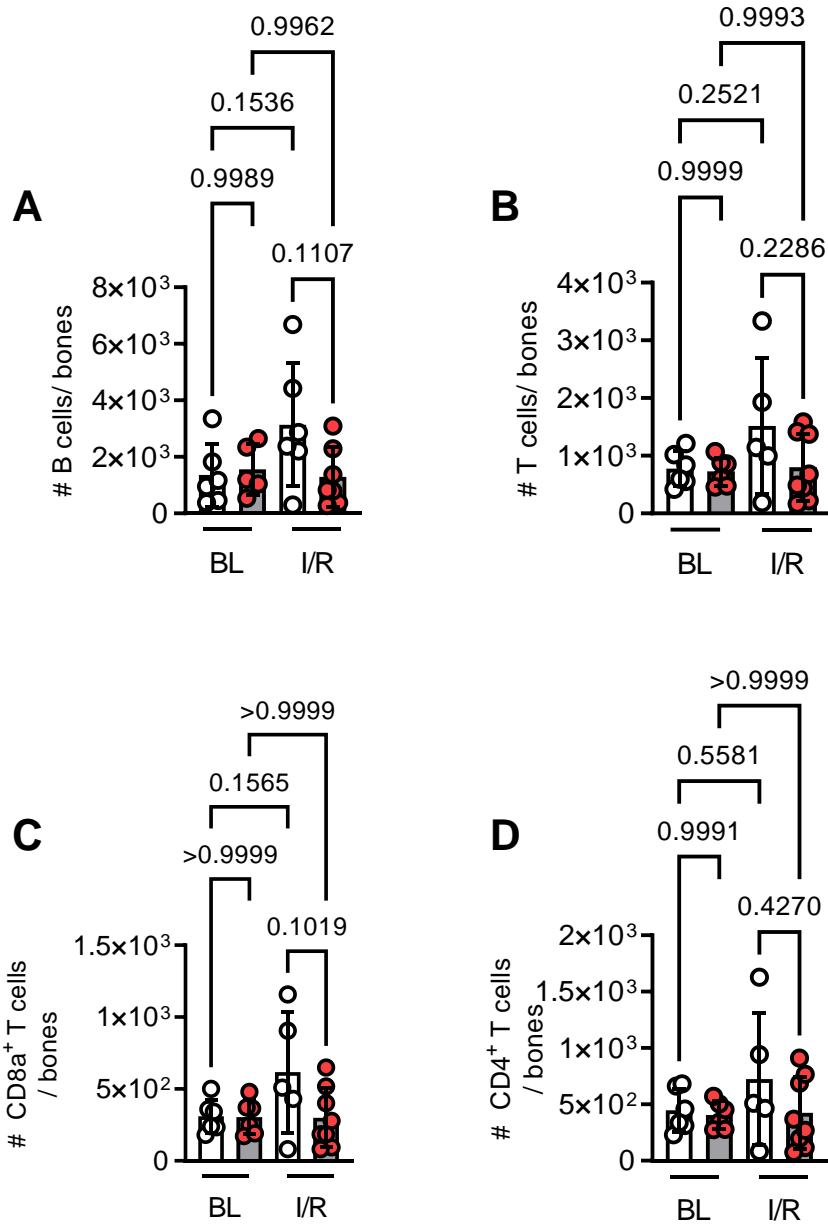

**Figure S19. Circulating lymphocytes at steady state and 72 hours post I/R.** C57BL6/J mice were treated with placebo or rivaroxaban for seven days and then subjected to cardiac I/R injury. Flow cytometric analysis of circulating lymphocytes at baseline and 72 hours after I/R. **A**, B cells (CD45<sup>+</sup>CD19<sup>+</sup>), **B**, T cells (CD45<sup>+</sup>CD3<sup>+</sup>), **C**, CD8a<sup>+</sup> T cells (CD45<sup>+</sup>CD3<sup>+</sup>CD8a<sup>+</sup>), **D**, CD4<sup>+</sup> T cells (CD45<sup>+</sup>CD3<sup>+</sup>CD4<sup>+</sup>) shown as absolute cell numbers (#); n = 6. Data represent mean ± SD; \*P < 0.05 vs. placebo; Statistical significance was determined by Ordinary one-way ANOVA followed by Sidak post hoc test.

## Supplementary Figure S20

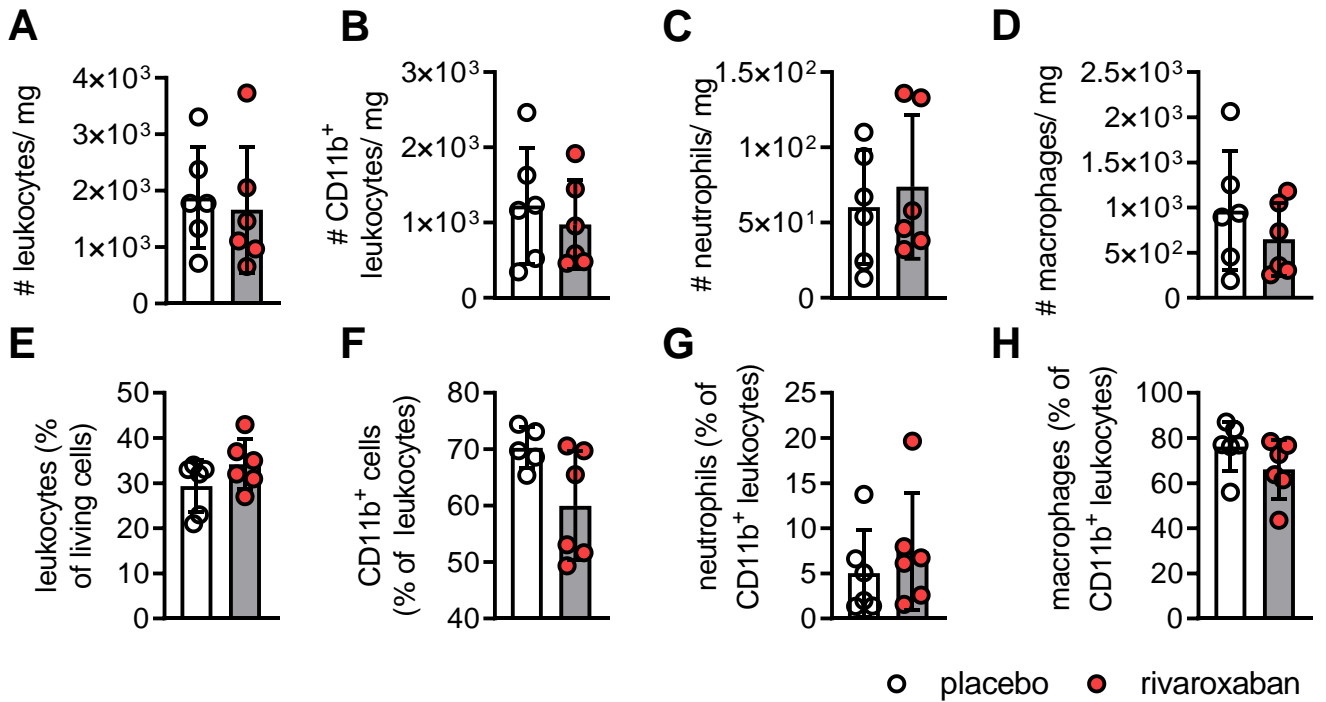

**Figure S20. Pretreatment with Rivaroxaban does not change cardiac leukocyte subsets.** Flow cytometric analysis of cardiac immune cells after 7 days of feeding (d7) with rivaroxaban or placebo. **A**, leukocytes (CD45<sup>+</sup>), **B**, myeloid leukocytes (CD45<sup>+</sup>CD11b<sup>+</sup>), **C**, neutrophils (CD45<sup>+</sup>CD11b<sup>+</sup>Ly6G<sup>+</sup>) and **D**, macrophages (CD45<sup>+</sup>CD11b<sup>+</sup>Ly6G<sup>-</sup>F4/80<sup>+</sup>) shown as cells per mg heart and **E-H**, percentages. n = 5-6. Data represent mean  $\pm$  SD.

# Supplementary Figure S21

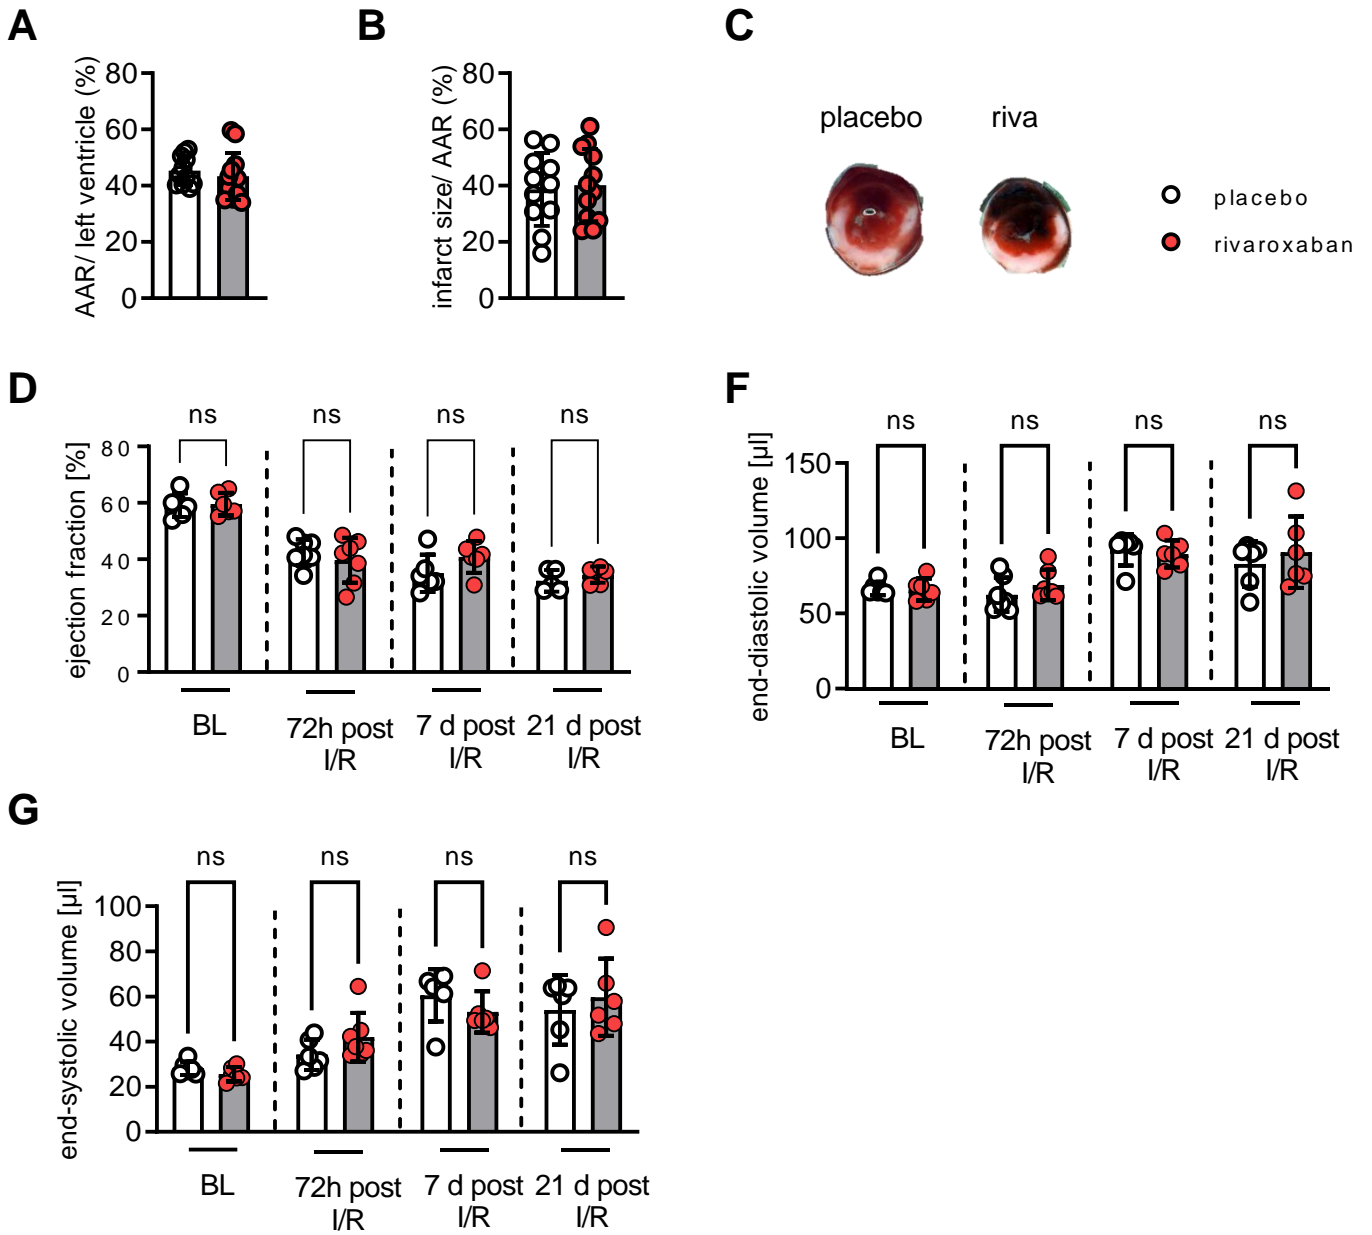

**Figure S21. Cardiac Function post I/R.** C57BL6/J mice were treated with placebo or rivaroxaban (riva) for seven days prior to I/R injury. Area at risk (AAR) and infarct size were determined by TTC-staining at 24 hours post I/R. **A**, area at risk (AAR), **B**, infarct size and **C**, representative TTC staining.  $n = 11-12$ . Hemodynamic function was assessed by echocardiography at baseline, 72 hours and 7 days post I/R and by MRI at 21 days post I/R. **D**, ejection fraction, **E**, end-systolic volume **F**, end-diastolic volume.  $n = 6-7$ . Data represent mean  $\pm$  SD; Statistical significance was determined by two-tailed unpaired Student's t-test. TTC = 2,3,5-Triphenyltetrazolium chloride.

# Supplementary Table S1

**Table S1: Descriptive statistics of rivaroxaban plasma concentrations [mg/l]**

|                       | 1 day<br>pre I/R 9<br>AM-<br>0.6g/kg<br>rivaroxab<br>an | 1 day<br>pre I/R 9<br>AM-<br>1.2g/kg<br>rivaroxab<br>an | 1 day<br>pre I/R 9<br>PM-<br>0.6g/kg<br>rivaroxab<br>an | 1 day<br>pre I/R 9<br>PM-<br>1.2g/kg<br>rivaroxab<br>an | 1 day<br>post I/R 9<br>AM-<br>0.6g/kg<br>rivaroxab<br>an | 1 day<br>post I/R 9<br>AM-<br>1.2g/kg<br>rivaroxab<br>an | 1 day<br>post I/R 9<br>PM-<br>0.6g/kg<br>rivaroxab<br>an | 1 day<br>post I/R 9<br>PM-<br>1.2g/kg<br>rivaroxab<br>an" |
|-----------------------|---------------------------------------------------------|---------------------------------------------------------|---------------------------------------------------------|---------------------------------------------------------|----------------------------------------------------------|----------------------------------------------------------|----------------------------------------------------------|-----------------------------------------------------------|
| Number<br>of values   | 3                                                       | 3                                                       | 3                                                       | 3                                                       | 3                                                        | 3                                                        | 3                                                        | 2                                                         |
| Minimum               | 0.1260                                                  | 0.4540                                                  | 0.3480                                                  | 1.080                                                   | 0.03830                                                  | 0.1050                                                   | 0.05680                                                  | 0.3320                                                    |
| Maximum               | 0.2560                                                  | 0.9460                                                  | 0.5520                                                  | 1.770                                                   | 0.3260                                                   | 0.7120                                                   | 0.1930                                                   | 0.7120                                                    |
| Range                 | 0.1300                                                  | 0.4920                                                  | 0.2040                                                  | 0.6900                                                  | 0.2877                                                   | 0.6070                                                   | 0.1362                                                   | 0.3800                                                    |
| Mean                  | 0.2060                                                  | 0.7720                                                  | 0.4223                                                  | 1.520                                                   | 0.1658                                                   | 0.3820                                                   | 0.1064                                                   | 0.5220                                                    |
| Std.<br>Deviation     | 0.07000                                                 | 0.2758                                                  | 0.1127                                                  | 0.3822                                                  | 0.1466                                                   | 0.3070                                                   | 0.07529                                                  | 0.2687                                                    |
| Std. Error<br>of Mean | 0.04041                                                 | 0.1592                                                  | 0.06506                                                 | 0.2207                                                  | 0.08465                                                  | 0.1772                                                   | 0.04347                                                  | 0.1900                                                    |



# Supplementary Table S2

**Table S2: Antibodies used for flow cytometric analysis of heart, blood, spleen and bone marrow**

| Antibody                               | Clone       | Cat.No.    | Vendor                   | Concentration |
|----------------------------------------|-------------|------------|--------------------------|---------------|
| <b>Cardiac myeloid leukocytes</b>      |             |            |                          |               |
| CCR2-FITC                              | SA203G11    | 150608     | Biolegend                | 1:25          |
| F4/80-PE                               | BM8         | 123110     | Biolegend                | 1:25          |
| MHCII-PE/Cy7                           | M5/114.15.2 | 107630     | Biolegend                | 1:25          |
| CD11b-PE/Dazzle™                       | M1/70       | 101256     | Biolegend                | 1:25          |
| CD11c-APC                              | N418        | 117352     | Biolegend                | 1:25          |
| CD45-AF700                             | 30-F11      | 103128     | Biolegend                | 1:25          |
| Ly-6C-APC/Cy7                          | HK1.4       | 128026     | Biolegend                | 1:25          |
| Ly-6G-PacBI                            | 1A8         | 127612     | Biolegend                | 1:25          |
| LIVE/DEAD Fixable Aqua                 |             | L34965     | Thermo Fisher Scientific | 1:25          |
| <b>Blood monocytes and neutrophils</b> |             |            |                          |               |
| CD115-APC                              | AFS98       | 17-1152-82 | eBioscience              | 1:25          |
| CD11b-PE                               | M1/70       | 101208     | Biolegend                | 1:25          |
| Ly-6C-AF488                            | HK1.4       | 128022     | Biolegend                | 1:25          |
| Ly-6G-PacBI                            | 1A8         | 127612     | Biolegend                | 1:25          |
| <b>BM myeloid leukocytes</b>           |             |            |                          |               |
| CD115-APC                              | AFS98       | 17-1152-82 | eBioscience              | 1:25          |
| CD11b-PE                               | M1/70       | 101208     | Biolegend                | 1:25          |
| Ly-6C-AF488                            | HK1.4       | 128022     | Biolegend                | 1:25          |
| Ly-6G-PacBI                            | 1A8         | 127612     | Biolegend                | 1:25          |
| CD115-APC                              | AFS98       | 17-1152-82 | eBioscience              | 1:25          |
| <b>Splenic myeloid leukocytes</b>      |             |            |                          |               |
| Ly6G-BV650                             | 1A8         | 127641     | Biolegend                | 1:80          |
| CD45-PE                                | 30-F11      | 103106     | Biolegend                | 1:80          |
| CD115-BV711                            | AFS98       | 135515     | Biolegend                | 1:50          |
| CD11b-PE/Dazzle                        | M1/70       | 101256     | Biolegend                | 1:100         |
| Ly6C APC/Cy7                           | HK1.4       | 128026     | Biolegend                | 1:200         |

# Supplementary Table S3

**Table S3: Antibodies used for flow cytometric analysis of bone marrow**

| Antibody                            | Clone                                  | Cat.No.    | Vendor         | Concentration |
|-------------------------------------|----------------------------------------|------------|----------------|---------------|
| <b>BM stem and progenitor cells</b> |                                        |            |                |               |
| Lineage-AF700                       | 17A2; RB6-8C5; RA3-6B2; Ter-119; M1/70 | 79923      | Biolegend      | 1:25          |
| CD34-FITC                           | RAM34                                  | 11034181   | eBioscience    | 1:25          |
| CD34 PE-Dazzle                      | HM34 / SA376A4                         | 128616     | Biolegend      | 1:50          |
| cKit(CD117)-PE                      | 2B8                                    | 105808     | Biolegend      | 1:25          |
| CD16/32-PerCPCy5.5                  | 93                                     | 101324     | Biolegend      | 1:25          |
| CD16/32-BV421                       | 93                                     | 101331     | Biolegend      | 1:50          |
| IL7ra(CD127)-PE/Cy5                 | A7R34                                  | 135016     | Biolegend      | 1:25          |
| Sca-1-PECy7                         | D7                                     | 108114     | Biolegend      | 1:25          |
| CD135(Flt3)-APC                     | A2F10                                  | 135310     | Biolegend      | 1:25          |
| Ly6G-BV650                          | 1A8                                    | 127641     | Biolegend      | 1:80          |
| CD45R(B220)-BV650                   | RA3-6B2                                | 103241     | Biolegend      | 1:80          |
| CD90.2-BV650                        | 30-H12                                 | 740443     | BD Biosciences | 1:80          |
| NK1.1-BV650                         | PK136                                  | 108735     | Biolegend      | 1:80          |
| CD81-PerCPCy5.5                     | Eat-2                                  | 104912     | Biolegend      | 1:80          |
| CD11b-BV785                         | M1/70                                  | 101243     | Biolegend      | 1:80          |
| CD115-BV711                         | AFS98                                  | 135515     | Biolegend      | 1:80          |
| CD106-FITC                          | 429                                    | 105706     | Biolegend      | 1:200         |
| Ly6C-APC/Cy7                        | HK1.4                                  | 128026     | Biolegend      | 1:320         |
| CD34-FITC                           | RAM34                                  | 11-0341-82 | eBioscience    | 1:50          |

# Supplementary Table S4

**Table S4: Antibodies used for flow cytometric analysis of BM-derived cells**

| Antibody                                             | Clone                                  | Cat.No.       | Vendor           | Concentration |
|------------------------------------------------------|----------------------------------------|---------------|------------------|---------------|
| <b>Mature leukocyte marker</b>                       |                                        |               |                  |               |
| CD19-PacBI                                           | 6D5                                    | 115523        | Biolegend        | 1:12.5        |
| Ly6G-BV650                                           | 1A8                                    | 127641        | Biolegend        | 1:12.5        |
| CD45-PE                                              | 30-F11                                 | 103106        | Biolegend        | 1:25          |
| CD3-AF700                                            | 17A2                                   | 100216        | Biolegend        | 1:50          |
| CD8a-AF647                                           | 53-6.7                                 | 100724        | Biolegend        | 1:50          |
| CD115-BV711                                          | AFS98                                  | 135515        | Biolegend        | 1:50          |
| F4/80-BV605                                          | BM8                                    | 123133        | Biolegend        | 1:50          |
| CD11b-PE/Dazzle                                      | M1/70                                  | 101256        | Biolegend        | 1:100         |
| CD4-FITC                                             | RM4-5                                  | MCD0401       | LifeTechnologies | 1:200         |
| Ly6C-APC/Cy7                                         | HK1.4                                  | 128026        | Biolegend        | 1:200         |
| <b>Hematopoietic stem and progenitor cell marker</b> |                                        |               |                  |               |
| Lineage-AF700                                        | 17A2; RB6-8C5; RA3-6B2; Ter-119; M1/70 | 79923; 133313 | Biolegend        | 1:25          |
| CD34 PE-Dazzle                                       | HM34                                   | 128616        | Biolegend        | 1:50          |
| CD16/32-BV421                                        | 93                                     | 101331        | Biolegend        | 1:50          |
| CD48-PE                                              | HM48-1                                 | 103405        | Biolegend        | 1:50          |
| c-Kit-PE/Cy7                                         | 2B8                                    | 105814        | Biolegend        | 1:100         |
| Sca-1-BV650                                          | D7                                     | 108143        | Biolegend        | 1:100         |
| CD150-PE/Cy5                                         | TC1512F12.2                            | 115912        | Biolegend        | 1:200         |

# Supplementary Table S5

Table S5: Primer pairs used for qPCR experiments.

| Gene symbol     | Forward 5' – 3'         | Reverse 5' - 3'          |
|-----------------|-------------------------|--------------------------|
| <i>18s rRNA</i> | GCAATTATTCCCATGAACG     | GGCCTCACTAAACCATCCAA     |
| <i>Il1b</i>     | GGATGAGGACATGAGCACCT    | CGTCACACACCAGCAGGTTA     |
| <i>Tnf</i>      | CGAGTGACAAGCCTGTAGCC    | AGCTGCTCCTCCACTTGGT      |
| <i>Spi1</i>     | AACAGATGCACGTCCTCGATAC  | ACAAGGTTTGATAAGGGAAGCAC  |
| <i>Klf4</i>     | CTTTCCTGCCAGACCAGATG    | GGTTTCTCGCCTGTGTGAGT     |
| <i>Cebpa</i>    | GATTCCGGTGTGGCCTGAAA    | TCAAGGAGAAACCACCACGG     |
| <i>Cebpb</i>    | TTGATGCAATCCGGATCAAACG  | CAGTTACACGTGTGTTGCGTC    |
| <i>Csf1r</i>    | TGGCCTTCCTTGCTTCTAAA    | GATGTCCCTAGCCAGTCCAA     |
| <i>Csf2rb</i>   | AGGGCACATGAGAGCTGACT    | CTATTTATCTGTGCCCATGACATT |
| <i>Irf8</i>     | GATCGAACAGATCGACAGCA    | GCTGGTTCAGCTTTGTCTCC     |
| <i>Nr4a1</i>    | TCTGCCTTCCTGGA ACTCTTCA | CAGGCCTGAGCAGAAGATGAG    |
| <i>Cxcl12</i>   | CATCAGTGACGGTAAACCAG    | GCACAGTTTGGAGTGTGAG      |
| <i>Cxcl2</i>    | GAAGTCATAGCCACTCTCAAGG  | CCTCCTTTCAGGTCAGTTAGC    |
| <i>Cxcl1</i>    | CCGAAGTCATAGCCACTCAA    | GCAGTCTGTCTTCTTCTCCGTTA  |
| <i>Ccl3</i>     | CATCGTTGACTATTTGAAACCAG | GCCGGTTTCTCTTAGTCAGGAA   |

# Supplementary Table S5

**Table S5: Baseline characteristics of patients with STEMI and pPCI**

| Baseline characteristics                  | antiplatelet control | rivaroxaban | p-Value |
|-------------------------------------------|----------------------|-------------|---------|
|                                           | (n = 15)             | (n = 9)     |         |
| Sex, men % (n)                            | 73 (11)              | 78 (7)      | 1.000   |
| Age, years                                | 58 ± 7               | 69 ± 11     | 0.030   |
| Body mass index, kg/m <sup>2</sup>        | 26 ± 2.9             | 27 ± 4.3    | 0.726   |
| Diabetes mellitus, % (n)                  | 13 (2)               | 22 (2)      | 0.615   |
| Hypertension, % (n)                       | 47 (7)               | 78 (7)      | 0.210   |
| Dyslipidaemia, % (n)                      | 47 (7)               | 56 (5)      | 1.000   |
| Smoker, % (n)                             | 80 (12)              | 67 (6)      | 0.635   |
| Stroke / Transient ischemic attack, % (n) | 13 (2)               | 11 (1)      | 1.000   |
| Previous myocardial infarction, % (n)     | 13 (2)               | 22 (2)      | 0.615   |
| SAPT, % (n)                               | 0.0 (0)              | 22 (2)      | 0.042   |
| Aspirin, % (n)                            | 0.0 (0)              | 0.0 (0)     | 1.000   |
| Clopidogrel, % (n)                        | 0.0 (0)              | 22 (2)      | 0.042   |
| DAPT, % (n)                               | 100 (15)             | 78 (7)      | 0.130   |
| Aspirin + Clopidogrel, % (n)              | 0.0 (0)              | 56 (5)      | 0.003   |
| Aspirin + Prasugrel, % (n)                | 6.7 (1)              | 22 (2)      | 0.533   |
| Aspirin + Ticagrelor, % (n)               | 93 (14)              | 0.0 (0)     | <0.001  |
| Statin, % (n)                             | 93 (14)              | 89 (8)      | 1.000   |
| ACE Inhibitor, % (n)                      | 100 (15)             | 100 (9)     | 1.000   |
| Beta Blockers, % (n)                      | 80 (12)              | 89 (8)      | 1.000   |
| Calcium Antagonist, % (n)                 | 0.0 (0)              | 11 (1)      | 0.375   |
